# Supplementary material for: Ecdysone-controlled nuclear receptor ERR regulates metabolic homeostasis in the disease vector mosquito Aedes aegypti
Source: PLoS Genet. 2024 Mar 11;20(3):e1011196. doi: 10.1371/journal.pgen.1011196 (PMC10957079; doi:10.1371/journal.pgen.1011196)
Supplement: S5 Table — (XLSX) [file pgen.1011196.s008.xlsx]

## Sheet: Fig.1
Fig.1 A
AaERR mRNA level
6 h PE	72 h PE	6 h PBM	18 h PBM	24 h PBM	36 h PBM	48 h PBM	60 h PBM	72 h PBM	96 h PBM
1.07008	0.792062	0.819719	1.04274	1.1937	6.43247	2.0649	1.21251	0.215007	0.281097
0.875108	0.428587	0.755563	1.08099	1.02062	5.95956	2.11411	1.09619	0.261606	0.260626
1.06788	0.763186	0.857521	1.08457	0.900468	5.6232	1.07343	1.20061	0.281887	0.278593
	0.517855	0.833212	0.915957	1.14202	6.29403	1.86014		0.253652	0.303244
Fig.1 B
AaERR mRNA level
Control	20E
0.815072	5.19936
1.1607	3.88613
1.00347	4.22319
1.05336	3.6765
Fig.1 C
AaERR mRNA level
iGFP	iEcR
0.866537	0.0992126
1.00928	0.117169
1.15136
1.20025	0.119631
0.884745	0.108568
0.935191	0.117984

## Sheet: Fig.2
Fig.2 A
pGL4.73	+	+	+
pAc5.1b	+	-	-
PGL4.10-AaERR	+	+	+
pAc5.1b-EcR	-	+	+
pAc5.1b-USP	-	+	+
20E	-	-	+
	3695.65	8454.55	43181.8
	4137.93	15000	36111.1
	3666.67	9000	37500
	4230.77	12941.2	29729.7
Fig.2 C
Fold enrichment of AaERR promoter fragments in ChIP
PAC5.1b	EcR/USP
0.939106	6.23825
1.05337	5.85235
1.01089	5.96632
Fig.2 D
Fold enrichment of AaERR coding region fragments in ChIP
Control region	EcR binding region
1.27618	43.5568
0.875782	40.8624
0.894731	41.6582

## Sheet: Fig.3
Fig.3 B
Repeat 1, data in Fig. 3B							Repeat 2								Repeat 3
Follicle size (mm)							Follicle size (mm)								Follicle size (mm)
iGFP	iAaERR						iGFP	iAaERR							iGFP	iAaERR
0.353727	0.351579						0.420051	0.219285							0.37774	0.280194
0.385834	0.36574						0.381752	0.215673							0.382561	0.256416
0.415194	0.366269						0.39481	0.216664							0.401921	0.237925
0.369215	0.398728						0.414057	0.231433							0.368036	0.253897
0.404353	0.356188						0.432229	0.306254							0.383245	0.237925
0.399384	0.369512						0.419711	0.250119							0.370614	0.265448
0.386022	0.295541						0.386954	0.253897							0.346721	0.226337
0.399229	0.364083						0.380565	0.219285							0.381065	0.236016
0.396115	0.321239						0.401981	0.220908							0.392876	0.211212
0.408996	0.358482						0.441654	0.227595							0.392088	0.272179
0.400313	0.378926						0.464765	0.243952							0.378935	0.251164
0.371999	0.322291						0.412906	0.276086							0.398053	0.261199
0.398349	0.366379						0.41423	0.228535							0.381065	0.230299
0.377097	0.354183						0.39883	0.257621							0.39865	0.248879
0.396701	0.371904						0.408676	0.279429							0.380252	0.245023
0.379932	0.357581						0.388612	0.276086							0.375527	0.238225
0.407973	0.390742						0.374893	0.283656							0.373621	0.229367
0.404519	0.353727						0.382001	0.297261							0.390323	0.259003
0.366902	0.311002						0.393361	0.2829							0.350341	0.311342
0.388593							0.446159	0.277805							0.401981	0.251826
0.405169							0.414057	0.286994							0.380502	0.26446
0.422524							0.418176	0.276086							0.38069	0.242386
0.43397							0.409955	0.28155							0.384547	0.2553
0.40677							0.414057	0.297021							0.407158	0.241007
0.379891							0.393361	0.261199								0.235511
0.382975							0.387384	0.267948								0.252676
0.394392							0.420051	0.276172								0.266522
							0.4002	0.277548
							0.39233	0.276775
Fig.3 C
Repeat 1, data in Fig. 3C							Repeat 2								Repeat 3
Egg number							Egg number								Egg number
iGFP	iAaERR						iGFP	iAaERR							iGFP	iAaERR
123	93						126	101							136	82
115	123						148	101							125	103
120	121						101	124							123	41
111	113						126	81							117	77
121	115						120	126							130	91
135	99						128	83							123	97
118	110						147	92							140	72
103	115						126	99							109	88
128	112						92	78							137	96
129	125						117	102							124	46
111	125						121	82							133	74
119	121						127	105							142	95
125	115						137	74							151	88
131	110						121	89							122	129
135	91						132	93							108	104
139	88						136	88							114	94
130	92						94	86							96	116
122	76						125	77							126	103
110	115						142	91							126	107
133	104						131	109							97	99
116	96						102	103							114	107
124							105	79							105	81
114							95	123								105
							125	82
							118	97
							136	112
							126
Fig.3 D
Vg mRNA level
iGFP	iAaERR
1.17487	0.352941
0.95429	0.333903
1.01572	0.331596
0.878126	0.30939

## Sheet: Fig.4
Fig.4 A
glucose				fructose				trehalose
iGFP	iAaERR			iGFP	iAaERR			iGFP	iAaERR
0.633442	2.70458			0.475982	2.51479			1.03198	1.44608
0.815203	1.65137			0.888719	4.78859			0.814262	1.3717
1.15247	3.73477			1.859	3.21434			0.995676	1.40451
1.39888	1.85152			0.776304	2.90467			1.01276	1.39628
	2.41534				7.00459			1.14533	1.26327
	4.82511				5.6793				1.54176
	5.06778				7.40452				1.33447
	6.74812								1.24713
	6.13304								1.498
	4.03413
Fig.4 C
glycogen
iGFP	iAaERR
0.88029	1.5431
1.15502	1.84697
1.06182	1.95856
0.922452	1.2576
0.957917	1.52266
1.0225	1.38385
	2.03423
Fig.4 E
Size of LDs
iGFP	iAaERR
29153.1	7547.4
18335	6882.75
19989.8	10316.5
25624.1	6953.64
25284.7	2760.82
21744.5	12480.9
21054.4
Fig.4 F
TAG
iGFP	iAaERR
0.986577	0.936242
1.03691	0.704698
0.97651	0.825503
0.991611	0.865772
1.03691	0.483221
0.971477	0.639262
	0.674497
	0.619128
	0.75
	0.780201
	0.775168
	0.734899

## Sheet: Fig.5
Fig.5 A					Fig.5B											Fig.5C
Volcano plot					KEGG pathway enrichment											Gene Set Enrichment Analysis Sankey and dot plot
gene_name	log2FoldChange	pvalue			##Databases: KEGG PATHWAY											Description	GeneRatio	pvalue	geneID	Count
LOC5575839	0.107475	0.561218			##Statistical test method: hypergeometric test / Fisher's exact test											Glycolysis / Gluconeogenesis	0.0355191	8.7831e-12	GAPDH/LDH/PGK/TPI/ALDH1A/DLAT/PYK/PFK/ENO/ALDO/GPI/PGM/PGAM	13
LOC5575838	1.56487	0.0542222			##FDR correction method: Benjamini and Hochberg											Pentose phosphate pathway	0.0245902	1.26693e-09	PGM/TAL/RPE/TKT/PFK/GLD/ALDO/G6PD/GPI	9
LOC5575837	0.198867	0.0882785														Fatty acid metabolism	0.010929	0.0151048	ACSL/FASN/ACACA/ACADVL	4
LOC5575836	0.805992	0.0842363			#Term	Database	ID	Input number	Background number	P-Value	Corrected P-Value	Input	Hyperlink
LOC5575834	-0.202352	0.517917			Carbon metabolism	KEGG PATHWAY	aag01200	18	85	1.32365e-12	4.95214e-11	23687404|5567031|5571930|5565774|5573466|5580166|5570233|5574496|5564492|5565629|5564768|5568472|5569520|5571664|5576532|5572093|5577095|5567423	http://www.genome.jp/kegg-bin/show_pathway?aag01200/aag:5573466%09red/aag:5564492%09red/aag:5569520%09red/aag:5571930%09red/aag:5577095%09red/aag:5572093%09red/aag:5564768%09red/aag:5568472%09red/aag:5565774%09red/aag:5567423%09red/aag:5565629%09red/aag:5576532%09red/aag:23687404%09red/aag:5574496%09red/aag:5570233%09red/aag:5571664%09red/aag:5580166%09red/aag:5567031%09red
LOC5575832	0.263414	0.363118			Biosynthesis of amino acids	KEGG PATHWAY	aag01230	15	50	1.4354e-12	4.95214e-11	23687404|5571930|5565774|5574496|5580166|5573466|5570648|5565629|5574529|5564768|5568472|5571664|5576532|5567031|5567423	http://www.genome.jp/kegg-bin/show_pathway?aag01230/aag:5573466%09red/aag:5580166%09red/aag:5567031%09red/aag:5571930%09red/aag:5564768%09red/aag:5568472%09red/aag:5565774%09red/aag:5567423%09red/aag:5565629%09red/aag:5570648%09red/aag:5576532%09red/aag:23687404%09red/aag:5574496%09red/aag:5571664%09red/aag:5574529%09red
LOC5575825	-0.0469502	0.843253			Glycolysis / Gluconeogenesis	KEGG PATHWAY	aag00010	13	37	8.7831e-12	2.02011e-10	23687404|5575706|5565774|5580166|5571397|5564492|5565629|5568472|5571664|5567031|5577095|5572750|5567423	http://www.genome.jp/kegg-bin/show_pathway?aag00010/aag:5564492%09red/aag:5575706%09red/aag:5567031%09red/aag:5577095%09red/aag:5568472%09red/aag:5565774%09red/aag:5572750%09red/aag:5565629%09red/aag:23687404%09red/aag:5567423%09red/aag:5571664%09red/aag:5580166%09red/aag:5571397%09red
LOC5575828	0.183075	0.163079			Pentose phosphate pathway	KEGG PATHWAY	aag00030	9	18	1.26693e-09	1.74836e-08	5572750|5571930|5573466|5564768|5568472|5567033|5567031|5572093|5577095	http://www.genome.jp/kegg-bin/show_pathway?aag00030/aag:5573466%09red/aag:5577095%09red/aag:5571930%09red/aag:5572093%09red/aag:5564768%09red/aag:5567033%09red/aag:5572750%09red/aag:5568472%09red/aag:5567031%09red
LOC5575829	-0.0726743	0.738384			Pyruvate metabolism	KEGG PATHWAY	aag00620	8	31	7.00936e-07	8.06077e-06	5575706|5569520|5565000|5570233|5567854|5564492|5571397|5565629	http://www.genome.jp/kegg-bin/show_pathway?aag00620/aag:5564492%09red/aag:5569520%09red/aag:5571397%09red/aag:5565629%09red/aag:5565000%09red/aag:5570233%09red/aag:5575706%09red/aag:5567854%09red
LOC5575831	-0.159308	0.559787			Starch and sucrose metabolism	KEGG PATHWAY	aag00500	6	20	8.71735e-06	8.59282e-05	5570644|5572750|5572509|5564353|5573623|5577095	http://www.genome.jp/kegg-bin/show_pathway?aag00500/aag:5573623%09red/aag:5577095%09red/aag:5570644%09red/aag:5572509%09red/aag:5572750%09red/aag:5564353%09red
LOC5575824	0.703286	0.0578664			Cysteine and methionine metabolism	KEGG PATHWAY	aag00270	6	28	4.46429e-05	0.000385045	5575706|5569520|5570233|5574496|5570648|5576532	http://www.genome.jp/kegg-bin/show_pathway?aag00270/aag:5570648%09red/aag:5569520%09red/aag:5576532%09red/aag:5574496%09red/aag:5570233%09red/aag:5575706%09red
LOC110674709	0.155905	0.632703			Pentose and glucuronate interconversions	KEGG PATHWAY	aag00040	4	26	0.00260743	0.0163557	5573033|5572674|5572427|5573466	http://www.genome.jp/kegg-bin/show_pathway?aag00040/aag:5573466%09red/aag:5572427%09red/aag:5572674%09red/aag:5573033%09red
LOC5579632	-0.148799	0.395964			Insect hormone biosynthesis	KEGG PATHWAY	aag00981	4	26	0.00260743	0.0163557	5568744|5573424|5571397|5572891	http://www.genome.jp/kegg-bin/show_pathway?aag00981/aag:5571397%09red/aag:5572891%09red/aag:5573424%09red/aag:5568744%09red
LOC5579633	1.0774	0.574642			Citrate cycle (TCA cycle)	KEGG PATHWAY	aag00020	4	31	0.00461564	0.021232	5570233|5564509|5564492|5569520	http://www.genome.jp/kegg-bin/show_pathway?aag00020/aag:5564509%09red/aag:5570233%09red/aag:5569520%09red/aag:5564492%09red
LOC5576812	-0.20833	0.322752			Toll and Imd signaling pathway	KEGG PATHWAY	aag04624	4	38	0.0088708	0.0382553	110678810|5575994|5564186|5568196	http://www.genome.jp/kegg-bin/show_pathway?aag04624/aag:5568196%09red/aag:110678810%09red/aag:5564186%09red/aag:5575994%09red
LOC5574751	-0.0500461	0.659845			Fatty acid metabolism	KEGG PATHWAY	aag01212	4	45	0.0151048	0.0499301	5571706|5568814|5567854|5565366	http://www.genome.jp/kegg-bin/show_pathway?aag01212/aag:5568814%09red/aag:5565366%09red/aag:5567854%09red/aag:5571706%09red
LOC5574752	0.386062	0.00354386			Purine metabolism	KEGG PATHWAY	aag00230	4	75	0.0684773	0.157498	23687451|5566827|5565629|5572750	http://www.genome.jp/kegg-bin/show_pathway?aag00230/aag:5566827%09red/aag:23687451%09red/aag:5565629%09red/aag:5572750%09red
LOC5574753	0.294191	0.365659			Arginine biosynthesis	KEGG PATHWAY	aag00220	3	13	0.0034069	0.0195897	5574529|5576532|5574496	http://www.genome.jp/kegg-bin/show_pathway?aag00220/aag:5574496%09red/aag:5574529%09red/aag:5576532%09red
LOC5574746	-0.0428086	0.771397			2-Oxocarboxylic acid metabolism	KEGG PATHWAY	aag01210	3	14	0.0040777	0.021232	5574529|5576532|5574496	http://www.genome.jp/kegg-bin/show_pathway?aag01210/aag:5574496%09red/aag:5574529%09red/aag:5576532%09red
LOC5574743	-0.122384	0.186304			Fructose and mannose metabolism	KEGG PATHWAY	aag00051	3	23	0.0137019	0.0497596	5580166|5567031|5568472	http://www.genome.jp/kegg-bin/show_pathway?aag00051/aag:5580166%09red/aag:5567031%09red/aag:5568472%09red
LOC5574745	0.0102485	0.964481
LOC5577736	0.094533	0.784448			--------------------
LOC5574744	-0.0594692	0.612593
LOC5574740	-0.317246	0.292038			#Term	Database	ID	Input number	Background number	P-Value	Corrected P-Value	Input	Hyperlink
LOC5574741	-0.0594564	0.737178
LOC5574742	0.372333	0.106281			--------------------
LOC5575983	0.339363	0.216057
LOC5571578	0.246849	0.363089			#Term	Database	ID	Input number	Background number	P-Value	Corrected P-Value	Input	Hyperlink
LOC5566217	0.502476	0.192072
LOC5566213	0.229164	0.766924			--------------------
LOC5566229	-0.363635	0.0786767
LOC5566228	0.0854215	0.367985
LOC5566227	-0.163446	0.572658
LOC5566238	-0.0544309	0.756472
LOC5574533	-0.189038	0.140852
LOC5574532	1.10051	0.0455303
LOC5574530	-0.081721	0.695863
LOC5574529	-0.792387	0.0137106
LOC5574528	-0.117447	0.0376704
LOC5574527	0.197022	0.236141
LOC5574525	0.161114	0.376958
LOC5574526	-0.263548	0.0654241
LOC110679230	-0.934871	0.403866
LOC5574522	0.367603	0.250443
LOC5574521	-0.173713	0.437477
LOC5572374	0.160193	0.202044
LOC5572375	0.162958	0.391899
LOC5572376	0.179903	0.114996
LOC5572377	0.382928	0.12866
LOC5572378	0.105347	0.662221
LOC5572036	-0.842169	0.194867
LOC5572033	-0.380797	0.463152
LOC5572032	0.310271	0.259326
LOC23687408	-0.367477	0.0670679
LOC5572030	-0.120681	0.456228
LOC5572026	0.595255	0.0146895
LOC5572024	0.150554	0.47449
LOC5572023	0.133255	0.641955
LOC5572017	0.0871536	0.89325
LOC5572018	0.466019	0.275463
LOC5572019	-0.435803	0.288639
LOC5572012	0.352855	0.233526
LOC110674731	-0.883635	0.018788
LOC5579813	0.662351	0.017315
LOC5579817	0.853774	0.0645918
LOC5579811	0.0289921	0.867937
LOC5579810	-0.108391	0.483531
LOC5579809	0.220005	0.471741
LOC5579816	0.0903284	0.79724
LOC5579819	-0.355911	0.0756545
LOC5579818	-0.38423	0.0246194
LOC5579820	-0.296181	0.362925
LOC5579822	0.332594	0.293092
LOC5579824	0.0672095	0.903953
LOC5579825	-0.208187	0.237219
LOC110674735	-0.134108	0.89831
LOC5579827	-0.37483	0.258097
LOC5574316	0.0173501	0.928958
LOC5574317	-0.177964	0.301723
LOC5574322	-0.855588	0.048863
LOC5566531	-0.265537	0.150213
LOC5574321	-0.0909567	0.461397
LOC5578495	-0.368322	0.400774
LOC5574324	-0.242022	0.532064
LOC5574326	-0.164623	0.33961
LOC5565125	-0.327765	0.311827
LOC5574328	-0.29282	0.0190583
LOC5574331	-0.0213681	0.954959
LOC5564257	-0.266419	0.189505
LOC5564251	-0.836167	0.347061
LOC5569465	2.14139	0.407351
LOC5569466	-0.0308738	0.90081
LOC5569467	0.16313	0.27665
LOC110674745	1.07366	0.398627
LOC5569470	-1.89844	0.00150899
LOC5569471	-0.190063	0.170974
LOC5569472	0.520157	0.215822
LOC5579472	0.258437	0.156116
LOC23687935	-0.290475	0.0924117
LOC5569473	0.519202	0.0445992
LOC5569474	-0.602375	0.678524
LOC5569475	-0.0185873	0.940362
LOC5569476	0.691986	0.000653378
LOC5569477	-0.0634627	0.817017
LOC5569478	-0.445459	0.0564991
LOC110680850	0.742458	0.480544
LOC5574649	-0.0354342	0.879347
LOC110674749	-0.623644	0.0447272
LOC5574647	-0.234911	0.461947
LOC5574648	0.0343124	0.768833
LOC5574653	0.618123	0.330286
LOC5574652	-0.380008	0.234806
LOC5575967	0.122778	0.747316
LOC5575968	-0.366201	0.0181695
LOC5564255	-0.297334	0.511998
LOC5564249	-0.252034	0.251486
LOC5564262	-0.0597571	0.862955
LOC5564218	0.160227	0.536368
LOC5564252	-0.117543	0.0578487
LOC5564219	0.18498	0.652163
LOC5574715	-0.123038	0.545869
LOC5574714	-0.470425	0.470948
LOC5574713	-0.11454	0.753055
LOC5574717	0.424718	0.464884
LOC5574718	0.526516	0.205833
LOC5574716	0.0481917	0.559403
LOC5574720	0.094281	0.634609
LOC5574724	0.0926572	0.642236
LOC5574723	0.608832	0.0684617
LOC110674760	-0.208667	0.199436
LOC5578809	-0.415389	0.210264
LOC5565491	-0.407545	0.0303564
LOC5567316	0.195856	0.286734
LOC5565507	-0.749855	0.0364745
LOC23687389	-0.10248	0.835805
LOC5577930	-0.126025	0.446816
LOC5578729	-0.0475983	0.717102
LOC5578727	0.585573	0.186117
LOC5578730	-0.213295	0.529175
LOC5578728	-0.252634	0.342114
LOC110674766	0.321604	0.650262
LOC5578732	-0.128794	0.387734
LOC5578731	0.295523	0.0420845
LOC5563879	0.128318	0.393991
LOC5563880	-0.142227	0.257691
LOC110674772	-0.0674641	0.72077
LOC110674775	-0.0457787	0.829878
LOC5568128	-0.923547	0.0851117
LOC5565478	-0.627414	0.110908
LOC110674776	0.211603	0.313417
LOC23687941	1.58265	0.261234
LOC5570397	-0.245685	0.397315
LOC5564724	-0.146429	0.500404
LOC5564728	0.500083	0.387301
LOC5576541	-0.254458	0.39833
LOC5576540	-0.389296	0.00571988
LOC5576535	-0.0612758	0.433415
LOC5576542	0.436228	0.508583
LOC5576538	-0.0708814	0.728095
LOC5564091	-0.15405	0.069131
LOC110674786	-0.291173	0.459727
LOC5567111	0.368946	0.0577533
LOC5567109	0.150354	0.45789
LOC5579417	-0.58953	0.357026
LOC5567112	0.6898	0.307798
LOC5567108	0.146536	0.490568
LOC5567097	-0.575241	0.0354606
LOC5567107	-0.31605	0.220448
LOC5564702	0.760902	0.390522
LOC5572314	0.0303178	0.879282
LOC5579242	-0.016901	0.94748
LOC5566179	-0.562189	0.00578534
LOC5577042	0.011397	0.9354
LOC5577043	-0.383964	0.0650679
LOC5574750	-0.247457	0.228112
LOC5577045	0.0945569	0.683672
LOC5577047	0.597525	0.584028
LOC5574747	-0.0635965	0.794139
LOC5565087	-0.0244987	0.867442
LOC110674796	0.109215	0.554772
LOC110674795	-0.303172	0.196832
LOC5565084	-0.158457	0.696022
LOC110674797	-0.651582	0.381811
LOC5565085	0.379536	0.029217
LOC5578389	-0.0895134	0.475482
LOC5578387	-0.403669	0.120925
LOC5575260	0.640635	0.439518
LOC5575264	0.411399	0.243412
LOC5575265	0.146793	0.442294
LOC5575266	-0.0473444	0.812987
LOC5564286	0.213102	0.325488
LOC5566787	-0.217348	0.188093
LOC5565679	-0.278833	0.240319
LOC5567841	-0.0921532	0.646403
LOC5564667	-0.525751	0.0406174
LOC5564669	0.0700629	0.903369
LOC5564668	-0.195622	0.494744
LOC5574426	-0.095814	0.777754
LOC5570126	1.04947	0.0405733
LOC5570128	-0.136734	0.425701
LOC5570125	-0.183225	0.643472
LOC5567849	0.0921651	0.568872
LOC5580063	-0.582864	0.0456424
LOC5580072	-0.219226	0.366173
LOC5580053	0.131239	0.624752
LOC5580057	-0.187339	0.25618
LOC5580073	-0.172567	0.0393305
LOC5580071	-0.236025	0.0897039
LOC5580067	0.0485023	0.72078
LOC5580065	-0.469827	0.0672351
LOC5580052	0.191079	0.447016
LOC5580062	0.220691	0.26179
LOC5580066	-0.0190897	0.938958
LOC5580068	-0.493702	0.219404
LOC5574208	-0.183723	0.634101
LOC5564914	-0.551298	0.54278
LOC5564916	-0.29634	0.0517826
LOC5564913	0.186565	0.725064
LOC5566361	0.46403	0.728968
LOC110674813	-0.11876	0.515857
LOC5578710	-0.0784741	0.918995
LOC23687811	0.20998	0.712
LOC5578281	-0.491656	0.0577356
LOC5569245	-0.758092	0.00181057
LOC110674815	-0.564006	0.087079
LOC5569249	-0.452722	0.0523788
LOC5573724	-0.529239	0.224092
LOC5573728	0.107529	0.846457
LOC5568331	-0.342982	0.068406
LOC5568329	-0.309195	0.0597725
LOC5568334	-0.392939	0.379336
LOC5565132	0.262683	0.148769
LOC5568330	1.21725	0.00994264
LOC5568333	-0.454694	0.0524302
LOC5570517	-0.186274	0.308514
LOC5568336	-0.0751323	0.834681
LOC5570528	-0.185112	0.225496
LOC5564957	-0.0486424	0.615719
LOC5565989	-0.103435	0.811011
LOC110674823	-0.591772	0.19096
LOC5564571	0.00084465	0.998308
LOC5571385	-0.232501	0.0561049
LOC5571386	0.0437554	0.807313
LOC5571381	0.023893	0.74559
LOC23687501	-0.646018	0.00251577
LOC5564076	-0.137186	0.379873
LOC5576501	-0.0309354	0.852204
LOC5574419	0.575026	0.204254
LOC5576500	0.129746	0.682293
LOC5576498	-0.000814363	0.999495
LOC5574725	0.400064	0.631039
LOC110674831	-0.0316162	0.981477
LOC5579033	-0.0844085	0.602102
LOC5579034	0.896421	0.118849
LOC5564713	0.252092	0.179299
LOC5579269	0.297375	0.476859
LOC5564714	0.179347	0.0114575
LOC5573415	1.32525	0.0602434
LOC110674834	-0.291032	0.267028
LOC110674836	0.231227	0.750219
LOC5577191	0.0426529	0.822222
LOC5577193	0.626139	0.0874576
LOC5577194	-0.0903485	0.788371
LOC5564018	-0.1671	0.175409
LOC5579971	-0.296424	0.0593301
LOC5577553	0.179673	0.26995
LOC5577552	-1.46426	0.339277
LOC5572256	-0.589478	0.0284059
LOC5565195	-0.485935	0.292427
LOC110674839	-0.319676	0.0397518
LOC5579063	0.154681	0.433215
LOC5569788	-0.0280109	0.962889
LOC5569800	-0.0280172	0.9685
LOC110674862	-0.234986	0.393067
LOC5571724	0.110989	0.413733
LOC5571722	-0.122657	0.668304
LOC5571723	-0.0518413	0.703612
LOC5566751	-0.273892	0.0328369
LOC5578702	-0.387131	0.107382
LOC5573032	0.380301	0.433606
LOC5573033	-2.826	1.11105e-05
LOC5578709	0.178228	0.378713
LOC5578708	-0.0404296	0.56512
LOC5578707	0.232205	0.752281
LOC5565190	-0.127506	0.505886
LOC5565192	0.250855	0.345399
LOC110673982	0.298808	0.515496
LOC5577442	-0.584136	0.422318
LOC5579883	-1.91647	0.240394
LOC5563768	-0.0634863	0.791155
LOC5579474	-0.522095	0.0580119
LOC5567660	-0.122344	0.534385
LOC5576758	0.192512	0.0702347
LOC5576759	-0.473188	0.378764
LOC110674174	-0.186477	0.312088
LOC110674873	-0.602354	0.258449
LOC5578378	-0.0316582	0.9472
LOC23687659	-0.0991355	0.352423
LOC5578374	0.0653226	0.743777
LOC5578376	0.507873	0.292006
LOC5572115	-0.432167	0.0501304
LOC5579456	-0.105603	0.512565
LOC5576924	-0.301567	0.137103
LOC5572113	0.0115039	0.969945
LOC5564686	-0.249467	0.275829
LOC5572129	-0.929365	0.0478263
LOC5564692	-0.137675	0.706746
LOC5563874	0.182134	0.154464
LOC5568027	-0.227611	0.386736
LOC5569408	-0.416593	0.00168701
LOC5569406	0.501681	0.138341
LOC5573614	-0.511726	0.0443894
LOC5566555	0.0101121	0.939697
LOC5564186	-0.819169	0.0297995
LOC5569417	-0.424427	0.134599
LOC5579467	0.0405497	0.883605
LOC5579466	-0.149682	0.628864
LOC5578380	-0.558289	0.0106969
LOC5573035	-0.173059	0.532932
LOC5573039	1.48443	0.256504
LOC5573038	-0.232517	0.293241
LOC5573036	-1.6365	0.0847878
LOC5573031	-0.259028	0.106368
LOC5579017	0.938579	0.0218291
LOC5577559	-0.768136	0.00205782
LOC5579016	-0.266694	0.101014
LOC5570295	0.669134	0.0338777
LOC5579012	-0.0489531	0.853654
LOC5579009	-0.398394	0.108515
LOC5579004	-0.388716	0.144572
LOC5579001	-0.445604	0.193234
LOC5579000	0.0353155	0.891881
LOC110675614	0.116733	0.187668
LOC5578999	0.688963	0.0306212
LOC110675634	-0.578474	0.249458
LOC110675593	0.102786	0.753087
LOC5578998	0.132038	0.74106
LOC5578997	-0.126587	0.24604
LOC110675740	-0.390274	0.111386
LOC5579479	0.145298	0.818537
LOC5565024	0.120914	0.412756
LOC5565025	0.168886	0.374285
LOC5565023	-0.108693	0.586049
LOC5565022	0.188471	0.234579
LOC5576277	-0.618416	0.54515
LOC5576275	-1.26546	0.116502
LOC5576274	-0.216671	0.480192
LOC5569206	-0.781929	0.0994824
LOC5569205	0.178835	0.0712926
LOC5569204	0.0132074	0.961624
LOC5569201	-0.216479	0.567643
LOC5569199	-0.239555	0.262941
LOC5569203	0.39606	0.157387
LOC5569200	-0.339243	0.51298
LOC5569196	0.183091	0.732535
LOC5569202	-0.273573	0.337942
LOC5569197	0.251942	0.451725
LOC5569198	0.246717	0.803542
LOC5566777	-0.29595	0.398184
LOC5566776	0.29475	0.560896
LOC5566775	0.0736378	0.553112
LOC5566774	-0.546496	0.326029
LOC5566773	0.240679	0.260906
LOC5566772	0.0253069	0.725845
LOC5566771	0.428729	0.0956468
LOC5566770	0.0236136	0.892076
LOC5566769	-0.134695	0.328803
LOC5566768	-0.154381	0.0844282
LOC5566778	0.110126	0.0121152
LOC5566765	-0.0475064	0.933783
LOC5566766	-0.318677	0.0778828
LOC5566767	-0.254557	0.0108223
LOC110676901	0.0654913	0.468943
LOC5569486	0.28202	0.227857
LOC5569484	0.058375	0.700621
LOC5569483	0.14237	0.626363
LOC5569480	1.01553	0.307773
LOC5573526	1.08198	0.14602
LOC5573532	-0.208516	0.364821
LOC5573531	0.163869	0.803272
LOC5573524	-0.490726	0.209199
LOC5573525	0.0626609	0.760027
LOC5573520	-0.201352	0.274711
LOC5573522	0.226749	0.841495
LOC5573523	0.181615	0.404824
LOC5573512	-0.00883596	0.931515
LOC5573515	-0.503965	0.0538747
LOC5569928	0.157561	0.682331
LOC5569936	0.0454508	0.571425
LOC110677788	-0.191847	0.162403
LOC5569934	-0.454735	0.537777
LOC5569932	0.324657	0.215471
LOC5568402	0.155645	0.429044
LOC5568406	0.033069	0.910144
LOC5568404	-0.0352031	0.882292
LOC5568405	-0.126764	0.767357
LOC5568403	-0.519367	0.0300132
LOC5568409	-0.390596	0.310278
LOC5568408	-0.136073	0.476171
LOC5568410	-1.27813	0.0306138
LOC5570648	-1.24711	0.000465159
LOC5570650	-0.302907	0.126675
LOC5570652	-0.0828909	0.485928
LOC5570651	-0.0778809	0.460771
LOC5570653	-0.26084	0.171517
LOC5570654	0.0696141	0.824122
LOC5570658	0.549821	0.0859051
LOC5574019	-1.27572	0.148884
LOC5574022	-0.00965587	0.985479
LOC5574017	-0.477021	0.00357914
LOC5574015	-0.222771	0.0970286
LOC5574013	0.1082	0.484705
LOC5574012	-0.241118	0.152657
LOC5574020	-0.390434	0.0136306
LOC5574011	0.380795	0.519954
LOC5571804	-0.236479	0.093853
LOC110679098	-0.198189	0.333654
LOC5571801	-0.283262	0.728693
LOC5571806	0.00571947	0.991371
LOC110679299	-0.0843608	0.12917
LOC5571799	-0.113828	0.797123
LOC5571798	-0.325492	0.274288
LOC5564965	-0.598592	0.329828
LOC110679564	-0.510983	0.00471425
LOC5564969	0.292345	0.426194
LOC5571991	-0.153824	0.856841
LOC5571990	-0.0173044	0.952458
LOC5571989	-0.760855	0.381661
LOC5571987	-0.63677	0.687765
LOC110674263	-1.27278	0.0288002
LOC5571981	0.0248528	0.869995
LOC5571983	-0.00492092	0.964691
LOC5571976	-0.198155	0.719998
LOC5571978	0.807582	0.308538
LOC5571977	-0.290888	0.142425
LOC5571980	-0.244838	0.14544
LOC5576059	0.0177607	0.922433
LOC110681295	0.958928	0.358254
LOC5573413	0.32167	0.0116313
LOC5573412	-0.0632618	0.42374
LOC5573411	0.194575	0.306811
LOC5573410	-0.0698771	0.222892
LOC5573409	-0.351967	0.123885
LOC5573407	0.0977189	0.108097
LOC5579020	-0.175733	0.30505
LOC5571382	0.208927	0.555027
LOC110681501	0.0842148	0.666203
LOC5571379	0.165316	0.862081
LOC5571384	-0.382236	0.393163
LOC5576828	0.0559534	0.637207
LOC5576066	-0.372887	0.212554
LOC5576072	-1.25482	0.0247323
LOC5576067	0.197161	0.785279
LOC5576070	0.475728	0.325065
LOC5569438	-0.0236753	0.862641
LOC5564154	0.552563	0.199263
LOC5564153	-0.172968	0.0517482
LOC5576074	0.110512	0.71282
LOC5573487	-0.1113	0.672273
LOC5564534	0.228346	0.157607
LOC5573489	-0.113489	0.574071
LOC5564532	-0.254083	0.327464
LOC110681571	-0.162458	0.442928
LOC5580025	-0.320462	0.107247
LOC5580024	-0.0574838	0.807074
LOC5580026	0.907104	0.018525
LOC5580023	0.0988125	0.519163
LOC5580021	-0.34867	0.157734
LOC5580019	-0.501258	0.091242
LOC5569128	0.0514223	0.690615
LOC5569126	0.312687	0.648629
LOC5568968	-0.204767	0.407795
LOC5578654	-0.158595	0.340671
LOC5570123	0.0707747	0.88567
LOC5570124	-0.320239	0.0252185
LOC5570121	-0.00383332	0.980182
LOC5570119	-0.046397	0.839646
LOC5570118	0.142106	0.652364
LOC5578310	0.226421	0.170165
LOC5578311	0.0267513	0.810955
LOC110674067	-0.258472	0.0545927
LOC5570115	0.270961	0.484776
LOC5570114	0.494021	0.583746
LOC23687938	0.0462789	0.837858
LOC5578306	-0.200747	0.693913
LOC5570111	-0.02816	0.947232
LOC5570110	1.0582	0.528592
LOC5570105	-0.304228	0.315397
LOC5570108	0.426651	0.0549639
LOC5570103	0.337063	0.320611
LOC5570104	-0.11068	0.576429
LOC5564358	-0.796066	0.321147
LOC5570838	0.225273	0.754892
LOC5569755	-0.0347544	0.951904
LOC5569753	-0.729972	0.0888737
LOC5569752	0.184924	0.262105
LOC5569750	-0.291884	0.187463
LOC5570746	-0.133418	0.595413
LOC5570747	-0.555904	0.0231168
LOC5570754	-0.166453	0.358059
LOC5570751	-0.306053	0.234356
LOC5570752	-0.0597202	0.61237
LOC5570749	0.186785	0.560074
LOC5570755	0.0632987	0.760744
LOC5570756	-0.120163	0.156598
LOC5564370	-0.134814	0.340315
LOC5564375	0.0033247	0.989435
LOC5570748	-0.29971	0.28965
LOC5570753	0.0620046	0.542532
LOC5570760	-0.322611	0.250904
LOC5564369	0.252259	0.289729
LOC5564365	-0.328922	0.177974
LOC5570763	0.113753	0.380944
LOC5570764	-0.26563	0.391959
LOC5570765	-0.02218	0.820623
LOC5570767	0.117378	0.518743
LOC5570768	0.112208	0.271132
LOC5570769	-0.0566719	0.769232
LOC5570770	0.179961	0.375934
LOC5570771	-0.144495	0.377464
LOC5564984	0.10825	0.334046
LOC5564988	0.671139	0.0141448
LOC5564999	-0.48469	0.0281201
LOC5578393	-0.230508	0.193146
LOC5564982	0.106994	0.524538
LOC5578392	-0.0480229	0.761596
LOC110674225	0.0471983	0.852016
LOC5571232	1.80785	0.0774954
LOC5571226	0.0380667	0.655643
LOC110674241	0.244518	0.144741
LOC5571233	0.538057	0.337655
LOC5579161	1.4007	0.175415
LOC5579160	-0.211168	0.322027
LOC5567951	0.093651	0.783926
LOC5564206	0.728686	0.0357063
LOC5572787	-0.512186	0.101462
LOC23687616	-0.428784	0.106884
LOC5572394	-1.48575	0.00803186
LOC5572392	-1.34637	0.000385815
LOC5572391	-0.306661	0.202236
LOC5572395	1.31312	0.223418
LOC5572390	0.12961	0.602317
LOC5577441	0.553562	0.465059
LOC110674569	2.71695	0.0867508
LOC5572384	-0.278956	0.249079
LOC5572383	-0.0363254	0.809304
LOC5572387	-0.508635	0.312413
LOC5572386	-0.558142	0.221548
LOC110674715	-0.123594	0.867011
LOC110674718	-0.406904	0.0575971
LOC5564150	-0.021163	0.9525
LOC5564151	-0.11621	0.611856
LOC110674739	0.5537	0.13116
LOC5578291	0.0901186	0.230414
LOC5578290	-0.206716	0.177519
LOC5578292	-1.27595	0.276821
LOC110674761	-0.79367	0.0486312
LOC5574145	-0.75775	0.399185
LOC110674791	-0.224126	0.191299
LOC5574147	-0.308667	0.285903
LOC5578621	0.608808	0.03324
LOC5578622	1.53776	0.142591
LOC5578623	1.42615	0.241879
LOC5578620	-0.206575	0.0171948
LOC5578624	-0.0550185	0.83913
LOC5578625	0.0479047	0.49664
LOC5578628	-0.106307	0.668336
LOC110674837	-0.555517	0.330769
LOC5565115	0.139191	0.113246
LOC5565116	-0.412002	0.151835
LOC5569550	0.477765	0.115947
LOC5569551	-0.150223	0.382035
LOC5569552	-0.292159	0.3672
LOC5569553	0.867064	0.156277
LOC5569554	0.448474	0.526491
LOC5569556	0.264485	0.142194
LOC5569562	-0.469252	0.12076
LOC5579329	-0.128578	0.474249
LOC5569559	-0.545574	0.195772
LOC110675150	0.59462	0.0434347
LOC110675153	-0.0829071	0.769973
LOC5569558	0.278555	0.673756
LOC5569563	-0.859799	0.0862201
LOC5569564	-0.13787	0.447263
LOC5569566	-0.0983834	0.609302
LOC5569568	0.316444	0.0192583
LOC5578887	0.068248	0.233232
LOC5578884	-0.228153	0.43162
LOC5578886	0.155778	0.377996
LOC5578888	-0.822403	0.285704
LOC5563948	0.0928821	0.734348
LOC5563945	0.174465	0.356013
LOC5563947	0.247027	0.766906
LOC110675246	-0.162238	0.298812
LOC5563946	0.0963027	0.846492
LOC5576370	-0.418341	0.0947278
LOC5576371	0.383745	0.142711
LOC5576373	-0.173433	0.599473
LOC110675288	-0.297102	0.0391095
LOC110675293	-0.162416	0.119655
LOC5566746	-1.2971	0.124956
LOC5574245	-0.149511	0.505541
LOC110675318	-0.282275	0.0530094
LOC5574247	-0.0553607	0.90378
LOC5574249	-0.0385201	0.700398
LOC23687986	-0.333829	0.154865
LOC5574250	-0.184929	0.0912003
LOC5579485	0.289631	0.255691
LOC5574253	-0.8948	0.0924561
LOC5574255	-0.119092	0.0982502
LOC110675351	1.18885	0.0734549
LOC5574257	-0.39068	0.331565
LOC5569921	-0.223964	0.412847
LOC5569920	-0.137592	0.810999
LOC5569924	-0.0104207	0.951009
LOC5569925	0.00108881	0.996663
LOC5569926	-0.293337	0.314035
LOC5569927	0.109245	0.295618
LOC110675386	-0.504237	0.564222
LOC5576026	0.0252558	0.897199
LOC5576023	0.625056	0.0149388
LOC5576024	-0.104785	0.389582
LOC5571213	1.27027	0.114496
LOC5566508	-0.323116	0.215209
LOC5566507	0.221378	0.383087
LOC5568484	-0.940369	0.00531723
LOC23687425	-0.226293	0.127845
LOC23687435	-0.266225	0.68228
LOC5566499	-0.27209	0.342507
LOC5566490	-0.0941631	0.600678
LOC5567617	0.312089	0.253544
LOC5566493	0.760726	0.417495
LOC5566495	-0.0859216	0.787465
LOC5566496	-0.14894	0.655097
LOC5571316	-0.0813374	0.879082
LOC5571317	0.281723	0.148118
LOC5571315	-0.167424	0.219865
LOC5571312	-0.461021	0.00725152
LOC5571311	-0.206366	0.522512
LOC5571310	-1.44489	0.13156
LOC5571309	-0.119206	0.563525
LOC5571308	-0.189824	0.190402
LOC110675527	-0.158062	0.611506
LOC5571307	0.156126	0.233652
LOC5571306	0.0733406	0.673322
LOC5571305	-0.409761	0.173363
LOC5571304	-0.343409	0.0123644
LOC5571303	-0.254128	0.37901
LOC5571302	-0.160602	0.634413
LOC5571325	0.285379	0.318564
LOC5571324	-0.050611	0.866469
LOC5571323	-0.00657213	0.94028
LOC5571322	-0.214905	0.330015
LOC23687488	-1.4621	0.227144
LOC5570456	-0.272381	0.172051
LOC5570455	0.0743174	0.708213
LOC5570450	0.137988	0.629444
LOC5570448	-0.21746	0.254616
LOC5568416	0.205383	0.111762
LOC5568414	1.34597	0.432641
LOC5568413	0.272413	0.604699
LOC5568412	0.142373	0.77077
LOC5564010	0.032002	0.873751
LOC5564011	0.145016	0.591721
LOC5564012	-0.0916653	0.425966
LOC5564013	0.0469749	0.917029
LOC110675736	-0.165451	0.842992
LOC5564822	-1.09096	0.245851
LOC5570094	-0.577948	0.00975238
LOC5574241	-0.0495667	0.904789
LOC110675779	-0.160479	0.814686
LOC5576601	-0.00675157	0.983986
LOC5576600	-0.232329	0.357015
LOC5576597	-0.220442	0.589026
LOC5576596	-0.963412	3.27767e-05
LOC5576595	0.293757	0.210032
LOC5576593	-0.0634041	0.59402
LOC5576594	-0.12848	0.38675
LOC5576592	-0.407119	0.209043
LOC5576603	-0.137837	0.315449
LOC110673991	0.0368918	0.76547
LOC110675821	-0.242906	0.657402
LOC110675833	-0.217082	0.880071
LOC110675839	0.165632	0.571441
LOC5576587	-0.190899	0.0862103
LOC5576586	0.714584	0.0304587
LOC5576584	0.0371867	0.861306
LOC5576585	-0.0469458	0.880952
LOC5578881	-0.0536204	0.727198
LOC5578880	0.522378	0.376246
LOC5575005	0.73259	0.18504
LOC5575004	-0.333691	0.0129653
LOC5575002	0.202083	0.724461
LOC5575001	1.52126	0.471866
LOC5575000	-0.785267	0.04542
LOC5574999	-0.380097	0.1053
LOC5574996	-0.217324	0.27624
LOC5574995	0.181334	0.434219
LOC5574994	-0.0765105	0.274631
LOC5574993	-7.30534e-05	0.999664
LOC5574992	-0.342596	0.101975
LOC5574991	0.152309	0.401954
LOC5574988	-0.238225	0.528792
LOC5574987	-0.239567	0.162509
LOC5574986	-0.114477	0.83318
LOC5574983	-0.18177	0.617812
LOC5574982	-0.436772	0.28075
LOC5574981	-0.199511	0.375703
LOC5574980	0.202539	0.118109
LOC5574979	-0.151601	0.435426
LOC5574978	0.0584008	0.838605
LOC5575006	0.250432	0.541581
LOC110674273	0.364659	0.692777
LOC5574977	-0.0858162	0.601275
LOC5574976	-0.0617836	0.572896
LOC5574975	-0.122861	0.551736
LOC5574974	-0.149904	0.454835
LOC5574971	-0.146299	0.58252
LOC5574970	0.268864	0.313444
LOC5574969	-0.426162	0.167392
LOC5567295	0.756521	0.268981
LOC5574964	0.183697	0.572622
LOC5574966	0.162196	0.195709
LOC5577017	-0.00906025	0.949762
LOC5577016	-0.0877702	0.434466
LOC5577019	0.0198123	0.789967
LOC5577022	-0.0812902	0.459543
LOC110676020	-0.0795429	0.728726
LOC5577023	-0.588777	0.0026587
LOC5577024	0.285592	0.325394
LOC5572545	0.0271399	0.907055
LOC5572540	-0.216848	0.602822
LOC5572551	-0.227992	0.299192
LOC5572543	0.0240766	0.86459
LOC5572541	0.78537	0.336461
LOC5572547	-0.354636	0.246536
LOC5572546	-0.567973	0.120121
LOC5572544	-0.0825161	0.665507
LOC5572548	-0.28521	0.125288
LOC110676091	-0.0570493	0.809204
LOC5580031	-0.213966	0.242059
LOC5580030	-0.0147923	0.907586
LOC5576686	-0.239458	0.16857
LOC5576683	-0.126241	0.685409
LOC5576682	-0.151889	0.369478
LOC5574701	-0.1243	0.286039
LOC5576685	-2.06095	0.00143408
LOC23687674	-0.296418	0.22445
LOC5570587	-0.122465	0.430272
LOC5570082	0.123791	0.616858
LOC5570591	-0.165653	0.264162
LOC5570592	-0.109957	0.762103
LOC5570593	-0.325096	0.281951
LOC5570596	-0.42745	0.223021
LOC5576864	0.170841	0.656573
LOC5570598	-0.257482	0.607957
LOC110676157	0.0346726	0.782355
LOC5574726	-1.88036	0.000802748
LOC5574727	0.0990023	0.855058
LOC5574728	0.236264	0.351006
LOC5579359	0.345939	0.443474
LOC5570419	-0.295105	0.0571913
LOC5570418	-0.326532	0.0123397
LOC5570416	0.042639	0.807494
LOC5570420	1.22501	0.209158
LOC5570415	1.29922	0.379239
LOC110676197	1.11687	0.252125
LOC5570412	-0.406332	0.0420583
LOC5566388	-0.305722	0.138911
LOC5572011	0.337576	0.125461
LOC5572010	-0.115449	0.746393
LOC110676221	-0.0339961	0.857507
LOC5572009	-0.497627	0.244933
LOC5572008	-0.163671	0.26791
LOC5572006	0.48473	0.067194
LOC5572005	0.182578	0.623586
LOC5572004	-0.200727	0.730877
LOC5572002	0.603819	0.241857
LOC5572000	-0.546971	0.16974
LOC5571998	0.32098	0.337519
LOC5571997	-0.0673508	0.850221
LOC110676240	-0.122671	0.615963
LOC110676249	0.321314	0.0273704
LOC5571993	-0.255117	0.341691
LOC5573529	-0.49588	0.0352707
LOC110676261	-0.110829	0.63957
LOC5580118	0.0231382	0.943915
LOC5580119	-0.47357	0.425846
LOC110676273	0.422875	0.0824151
LOC5580129	-0.071222	0.705806
LOC23687982	-0.448348	0.0894394
LOC5580128	-0.137004	0.190696
LOC5580059	-0.309523	0.414352
LOC5580060	-0.12106	0.413662
LOC5580124	-0.160452	0.532204
LOC110676296	-0.0884528	0.676342
LOC5580123	-0.299583	0.313013
LOC5580130	-0.612677	0.107657
LOC5567907	-0.0274629	0.783266
LOC5567908	-0.291536	0.21089
LOC5567927	-0.415998	0.265394
LOC5567919	0.235077	0.712934
LOC5574574	-0.024348	0.900819
LOC5574573	0.213892	0.565109
LOC5567930	-0.509502	0.0252996
LOC5567931	-0.24028	0.0863981
LOC5567934	-0.329329	0.113888
LOC5567928	0.061398	0.626853
LOC5567933	-0.0195642	0.78015
LOC23687785	0.12687	0.484225
LOC5567929	-0.161062	0.330586
LOC5580074	-0.24114	0.409857
LOC5580054	0.10914	0.55796
LOC5580055	-0.306603	0.161268
LOC5580056	0.199141	0.0590126
LOC5580058	-0.399217	0.0368993
LOC5580070	-0.0441151	0.652454
LOC5569694	2.96934	0.356996
LOC5569683	0.509508	0.209942
LOC5569684	-0.707781	0.0692418
LOC5578806	-0.0557967	0.54461
LOC5568097	-0.51101	0.037652
LOC5564407	-0.608117	0.328876
LOC5575418	-0.0389277	0.890664
LOC5575420	-0.593487	0.0265786
LOC5564408	-0.636023	0.0161057
LOC5564402	-0.144117	0.272726
LOC5564391	-0.0630401	0.817204
LOC5564403	-0.0212173	0.930347
LOC5564392	-0.183657	0.305982
LOC5564409	-0.104542	0.720238
LOC5564399	0.0655637	0.904202
LOC5564393	-0.110251	0.751713
LOC5564395	-0.118709	0.828491
LOC5564400	0.0929738	0.762262
LOC5564396	-0.373781	0.340201
LOC5564404	0.346906	0.258481
LOC5564405	0.444148	0.17815
LOC5575879	0.0142657	0.9617
LOC5576459	-2.39325	0.428203
LOC5576461	-0.267207	0.231343
LOC23687559	0.286021	0.302797
LOC5576462	-0.705049	0.258789
LOC5576465	-0.285121	0.0110443
LOC5576466	-0.0415317	0.823483
LOC5576467	0.207014	0.393595
LOC23687419	0.283009	0.658004
LOC5576468	-0.229102	0.42938
LOC5576470	0.00837598	0.977303
LOC110676521	0.08767	0.649614
LOC5576471	-0.176433	0.275531
LOC5576472	-0.00380527	0.989611
LOC5579259	-0.0753993	0.822186
LOC5576475	-0.253838	0.512813
LOC5576477	-0.111102	0.529434
LOC5576479	0.233234	0.733756
LOC5576478	-0.181688	0.0503938
LOC5576480	0.105277	0.63611
LOC5576481	0.40784	0.609208
LOC5576483	-0.186077	0.353106
LOC5576484	0.498406	0.429621
LOC5576486	-0.0981798	0.458737
LOC5576487	0.264625	0.00222031
LOC5576488	-0.048449	0.872394
LOC5575639	-0.0744184	0.647123
LOC5570714	-0.211872	0.14705
LOC5579374	0.034484	0.814307
LOC5570710	-0.0691202	0.806904
LOC5570709	-0.450798	0.247403
LOC5570708	-0.184182	0.175725
LOC5570707	0.172504	0.207487
LOC5570705	0.104949	0.828762
LOC5570704	0.0562627	0.708803
LOC5570703	-0.13381	0.298841
LOC5570702	0.526698	0.0136657
LOC5570698	0.0624989	0.876135
LOC5570699	0.0618368	0.846659
LOC5570701	-0.393003	0.152895
LOC110676660	-1.14052	0.107333
LOC5570700	-0.386602	0.576766
LOC5571564	0.305718	0.0103871
LOC5571561	-0.0554032	0.435644
LOC110676675	0.155143	0.549444
LOC110676681	-0.42788	0.174991
LOC5571571	-0.154015	0.0753875
LOC110676690	0.179676	0.537416
LOC5571567	-0.0979783	0.416559
LOC5571572	0.0164301	0.905643
LOC5571573	0.208045	0.286918
LOC5571574	-0.321023	0.196757
LOC5569255	-0.562227	0.438298
LOC5569251	-0.1448	0.764485
LOC5566037	0.110605	0.771433
LOC5566038	-0.316039	0.215599
LOC5572162	1.61745	0.441096
LOC5567106	-0.149378	0.751683
LOC5567105	0.418713	0.278828
LOC5567104	0.0257637	0.691867
LOC5567102	-0.690256	0.153342
LOC5567101	-0.0265722	0.870666
LOC5567100	-0.0624865	0.729897
LOC110676783	-0.866419	0.27569
LOC5565950	0.038681	0.757819
LOC23687992	0.000313149	0.998593
LOC5566101	-0.282816	0.170506
LOC5565274	-0.148833	0.398439
LOC5565276	0.394639	0.283991
LOC5565260	-0.225106	0.467589
LOC5565270	-0.327453	0.012103
LOC5565271	-0.151134	0.432904
LOC5565253	-0.424743	0.109986
LOC5565275	0.0204276	0.861845
LOC5565269	0.698271	0.598753
LOC5577061	-0.111829	0.237633
LOC5578826	0.284731	0.219417
LOC5578825	-0.377087	0.124033
LOC5578829	-0.261364	0.284548
LOC5578828	-0.276982	0.500113
LOC5578827	0.0165008	0.779495
LOC5565015	-0.263908	0.243647
LOC5565017	-0.447817	0.0971582
LOC5577264	1.32728	0.0268701
LOC5575022	-0.374728	0.28753
LOC110674283	0.122695	0.821858
LOC5575024	-0.312763	0.15705
LOC5575025	0.112861	0.769157
LOC5567734	-0.0747851	0.787083
LOC5567724	-0.0423007	0.805363
LOC110673998	-0.0745509	0.894805
LOC5567723	-0.347125	0.0338827
LOC5567722	-0.115484	0.26032
LOC5567052	0.0216652	0.939788
LOC5567037	-0.485366	0.341362
LOC5567039	-0.300177	0.603974
LOC5567040	0.82557	0.0127871
LOC5567041	0.188444	0.188372
LOC5567042	-0.0805632	0.825539
LOC5578655	0.42919	0.102669
LOC5567045	0.101309	0.874159
LOC5567053	-0.0259489	0.929174
LOC5579439	0.473838	0.40054
LOC5576313	-0.0631524	0.865195
LOC5576299	-0.377028	0.135426
LOC5576300	-0.244019	0.215298
LOC5576302	-0.00829199	0.946565
LOC5576304	0.269655	0.715027
LOC5576312	0.198638	0.374508
LOC5576307	-0.316687	0.180384
LOC5576308	-0.801396	0.0631053
LOC5576309	-0.0495659	0.821255
LOC5576310	-0.784934	0.258449
LOC5576311	-0.387121	0.118773
LOC5566946	-0.26292	0.22733
LOC5566958	-0.0987837	0.776526
LOC5566947	0.277609	0.563894
LOC5566959	0.0553506	0.497097
LOC110676975	-0.239222	0.281972
LOC5564185	0.139613	0.406041
LOC110676980	-0.24621	0.618423
LOC5567571	0.793533	0.399317
LOC5567565	0.0460993	0.866405
LOC5567564	0.355797	0.0249189
LOC5567559	-0.13871	0.360156
LOC5567560	-0.41244	0.0219819
LOC5567561	-0.367969	0.122818
LOC5567562	0.0125675	0.981941
LOC5568685	-0.394662	0.0581648
LOC5568687	1.52111	0.425494
LOC5568678	0.369035	0.590985
LOC5568674	0.121676	0.755251
LOC5568675	0.156269	0.263158
LOC5568679	-0.482173	0.0843631
LOC5568680	-0.245703	0.147
LOC5576900	0.291117	0.498182
LOC110677044	0.0683169	0.45798
LOC5576897	-0.128858	0.043817
LOC5576896	-0.0754348	0.626077
LOC5576894	0.216799	0.482781
LOC110677055	-0.520374	0.0224758
LOC5576893	-1.1992	0.0128516
LOC5576891	-0.675058	0.00115376
LOC5576890	-0.427141	0.312242
LOC5576886	-0.705277	0.0059321
LOC5576881	-0.585267	0.0722927
LOC5576880	0.346156	0.318336
LOC5576879	-0.109001	0.330608
LOC5576878	-0.0861319	0.575379
LOC5576877	-0.201367	0.452803
LOC23687875	0.464391	0.351131
LOC5576876	-0.436716	0.0158469
LOC5576873	-0.0519496	0.85607
LOC5576871	-0.716169	0.254186
LOC5577953	-0.178172	0.216975
LOC5577955	-0.210885	0.209985
LOC5575874	0.641988	0.546844
LOC110677164	-0.620142	0.262996
LOC5573561	-0.335288	0.000470026
LOC5573557	-0.0689429	0.705942
LOC110677190	-0.497223	0.214203
LOC5564074	0.359327	0.176125
LOC5564073	0.042219	0.797116
LOC5564047	-0.03801	0.705954
LOC5564058	-0.258435	0.240417
LOC5564072	-0.15835	0.322191
LOC5564060	0.546789	0.0302246
LOC5564039	-0.112257	0.51357
LOC5564049	-0.223908	0.189801
LOC5564061	0.127529	0.362056
LOC5564048	-0.14081	0.384155
LOC5564038	0.141799	0.754819
LOC5564042	-0.0472958	0.967464
LOC5564062	-0.124436	0.414198
LOC5564034	-0.377471	0.0760075
LOC5564055	-0.399284	0.0173448
LOC5564041	-1.4373	0.00111713
LOC5564045	-0.00672342	0.957159
LOC5564064	0.195447	0.105586
LOC5564046	0.343874	0.33545
LOC5564063	-0.065181	0.789764
LOC23687618	0.0918021	0.088449
LOC5564054	-1.81513	0.368963
LOC5564053	0.33499	0.222913
LOC5564040	-0.0714033	0.737914
LOC5564066	-0.778792	0.00651739
LOC5564052	-0.655314	0.154341
LOC5564033	-0.122224	0.252043
LOC5579306	-0.0803193	0.595379
LOC5564068	-0.25877	0.2412
LOC5564056	0.149911	0.382923
LOC5564065	-1.18358	0.0123056
LOC5571511	-0.482756	0.078471
LOC5571510	0.31168	0.396623
LOC5571509	0.244256	0.274576
LOC5571508	-0.00925445	0.97292
LOC5571507	-0.200112	0.340446
LOC5571506	0.117611	0.16766
LOC5571505	0.0821939	0.308694
LOC5571504	-0.271966	0.391086
LOC5571503	0.274315	0.446375
LOC5571502	0.159504	0.767118
LOC5579338	0.00262752	0.993236
LOC5571500	0.0127345	0.9061
LOC5571499	-0.54862	0.320233
LOC5571498	0.705798	0.211798
LOC5571497	-0.494472	0.244394
LOC5571496	0.296526	0.567093
LOC5571495	0.297951	0.443179
LOC5571494	-0.00153785	0.995312
LOC5571493	-0.506737	0.0128367
LOC5571492	0.0343373	0.89599
LOC5571481	0.602314	0.153373
LOC5571482	0.865453	0.0751485
LOC5571483	-0.427205	0.0979746
LOC5578497	-0.132985	0.510903
LOC110677665	-0.135786	0.36467
LOC5580111	-0.018356	0.89969
LOC5579337	-0.282032	0.0939959
LOC5580112	1.62967	0.25798
LOC5580104	-0.447091	0.217167
LOC5580105	0.724315	0.0559883
LOC5580107	-0.0763997	0.648583
LOC5578658	-0.10941	0.4932
LOC5578659	-0.231656	0.277833
LOC5572862	0.155484	0.282891
LOC110677718	0.480901	0.208846
LOC5566087	-0.309126	0.0739911
LOC5572102	0.209645	0.52366
LOC5572103	-0.398734	0.00514131
LOC5572105	-0.582101	0.0645637
LOC5575868	0.21242	0.443753
LOC5575867	0.172963	0.213805
LOC110674289	-0.294035	0.51492
LOC5575865	0.315325	0.678152
LOC5575869	0.0968318	0.709327
LOC5575870	-0.123861	0.318291
LOC5575871	0.177118	0.768767
LOC5575872	-0.320268	0.263019
LOC5575873	-0.0217515	0.939379
LOC5577249	-0.350292	0.0242822
LOC5577250	-0.305657	0.591069
LOC5577252	0.54394	0.0138858
LOC5577253	-0.616955	0.0111327
LOC5577254	-0.641043	0.323662
LOC5577255	-0.0649717	0.764376
LOC5577256	0.252549	0.0957155
LOC5577257	0.0610829	0.566059
LOC5577258	-0.17285	0.161874
LOC110677824	1.54806	0.220087
LOC5579197	0.268998	0.202202
LOC23687855	-0.229112	0.290501
LOC5579201	0.191201	0.670023
LOC5579196	0.492782	0.0170254
LOC5579199	0.10527	0.400639
LOC5579200	-0.00976158	0.951996
LOC5579202	-0.320199	0.123068
LOC5577891	-0.568462	0.0993896
LOC5578147	0.274946	0.236647
LOC5578146	-0.0871838	0.316687
LOC5578145	0.0521742	0.517826
LOC5578144	-0.0288174	0.857796
LOC5578143	0.297473	0.273282
LOC5578139	-1.07923	0.0836615
LOC5565046	0.00372186	0.991546
LOC5565059	-0.150482	0.571942
LOC5565070	0.338594	0.272387
LOC5565042	-0.247139	0.433038
LOC5565044	0.0320212	0.857259
LOC5565054	0.95909	0.357079
LOC5579301	-0.129782	0.276055
LOC5565060	-0.177598	0.297447
LOC5565033	-0.0821973	0.719643
LOC5565048	-0.186897	0.179334
LOC5565066	0.235686	0.755134
LOC5565031	0.281787	0.259139
LOC5565073	0.647344	0.105358
LOC5565035	0.271568	0.706144
LOC5565051	0.241024	0.281184
LOC5565039	-0.0364752	0.743029
LOC5565063	0.396711	0.0108958
LOC5565067	-0.103493	0.321972
LOC5565050	-0.0667797	0.652837
LOC5565037	0.103579	0.385156
LOC5565032	-0.534466	0.0121526
LOC5565038	0.727701	0.576139
LOC5565072	0.0890174	0.563728
LOC5565047	-0.559072	0.303001
LOC5565055	-0.40291	0.177218
LOC5565040	0.115274	0.330816
LOC5565071	-0.68645	0.230298
LOC110677913	-0.0806927	0.862968
LOC5565045	0.0142766	0.976996
LOC5565261	0.0631559	0.860212
LOC5565259	-0.915107	0.314329
LOC5565258	-0.74016	0.0324421
LOC5565257	-0.439934	0.044969
LOC5565255	-0.138366	0.482196
LOC5576555	-0.0991787	0.648879
LOC110677952	-0.0302607	0.915932
LOC110677955	-0.195833	0.337454
LOC5576560	0.0955887	0.605756
LOC110677960	-0.331373	0.0565703
LOC5576559	-0.277586	0.279498
LOC5576558	-0.320785	0.140913
LOC23687387	0.449534	0.384698
LOC5576002	-0.164315	0.387736
LOC5576008	-0.0371957	0.797946
LOC5576010	0.194794	0.312383
LOC5576006	-0.0232934	0.964915
LOC5576003	0.116341	0.68881
LOC5576001	-0.209566	0.279911
LOC5576005	0.0630846	0.756378
LOC110678003	0.163219	0.638166
LOC5576007	-0.245225	0.150079
LOC5576012	-0.154586	0.122066
LOC5576013	0.375107	0.0390896
LOC5572170	0.892983	0.000510626
LOC5575287	-0.266388	0.183609
LOC5575290	-0.0694075	0.718459
LOC5575294	0.172221	0.278321
LOC5575286	-0.473297	0.469599
LOC5575296	-0.13063	0.682209
LOC110678056	-0.026417	0.926243
LOC110678069	0.0713773	0.650007
LOC5575292	-0.164261	0.431815
LOC5575293	0.105367	0.672999
LOC5579213	0.595495	0.125105
LOC5579214	0.0129614	0.966631
LOC5579216	0.155263	0.709769
LOC5570619	-0.0790626	0.57102
LOC5570613	-2.08582	0.404409
LOC5570614	0.0226477	0.939026
LOC110678164	-0.280771	0.5593
LOC5569672	0.274447	0.0235173
LOC5569674	-0.137055	0.154695
LOC5565331	0.238062	0.504433
LOC5569671	0.0383763	0.591549
LOC5565330	0.193698	0.20353
LOC5569670	0.320494	0.0485968
LOC5565333	0.0192571	0.898979
LOC5575090	0.171392	0.750888
LOC5564601	0.0549439	0.818958
LOC5564602	0.198771	0.499899
LOC5566651	-0.0797241	0.303877
LOC5566636	-0.558298	0.0813066
LOC5566638	-0.248055	0.0997191
LOC23687857	0.591141	0.0274657
LOC5566654	-0.0837359	0.504831
LOC23687751	0.0794829	0.858129
LOC110678372	-0.360292	0.490669
LOC5565202	-0.127924	0.466947
LOC5566079	-0.0337548	0.816175
LOC5575432	-0.122929	0.378604
LOC5575427	-0.0809191	0.722732
LOC5575428	0.0365802	0.72204
LOC110678487	0.107211	0.886888
LOC5579482	0.356972	0.518918
LOC110678495	-0.0719672	0.700758
LOC110678504	0.277394	0.359749
LOC5569994	-0.122077	0.292835
LOC5577889	-0.0166524	0.948859
LOC110678556	0.830849	0.379728
LOC5577888	-0.664207	0.112443
LOC5578382	-0.223958	0.263356
LOC5578379	-0.607911	0.170535
LOC5578384	2.9937	0.37524
LOC5575469	-0.206621	0.214249
LOC110678613	-0.0570365	0.940816
LOC5575471	0.117132	0.521174
LOC5575470	-0.63147	0.0758268
LOC5577673	0.556915	0.0408803
LOC110678654	0.0330321	0.960396
LOC5577671	-0.796511	0.00108309
LOC5571583	-0.358948	0.0670945
LOC5571580	0.619385	0.206472
LOC110678669	0.317345	0.324941
LOC5568549	0.00881153	0.938653
LOC5568548	-0.394158	0.160978
LOC5568545	-0.369467	0.0374645
LOC5568544	0.164361	0.550038
LOC5568541	0.143147	0.593625
LOC5568540	-0.124807	0.545824
LOC5568539	-0.348418	0.00659727
LOC5568538	-0.23622	0.103156
LOC5568537	0.0032712	0.987417
LOC5568536	-0.179013	0.338889
LOC5568535	-0.033271	0.760668
LOC5568532	-0.144107	0.72535
LOC5568531	0.910209	0.138519
LOC110678773	-0.0972365	0.629571
LOC5578712	-0.430027	0.0935453
LOC5578713	-0.536799	0.00391265
LOC5578714	-0.277047	0.0726814
LOC5578715	-0.0841644	0.565005
LOC5565256	-0.770744	0.0318845
LOC5565264	0.487493	0.359066
LOC5565265	-0.247975	0.0373936
LOC5565266	0.0424327	0.883902
LOC5565268	0.769591	0.0504087
LOC5564415	1.41737	0.107956
LOC5564417	-1.00128	0.0629783
LOC5564418	-0.122171	0.607237
LOC5572774	0.211176	0.188518
LOC5572778	0.665596	0.213865
LOC110678859	0.202574	0.606412
LOC5572777	-0.207301	0.052944
LOC23687841	0.807667	0.0207383
LOC5572776	0.268406	0.517903
LOC5572775	-0.257674	0.463124
LOC5572780	-0.298642	0.127876
LOC5572782	-0.196332	0.280421
LOC5580228	0.11811	0.635736
LOC5580229	-0.302929	0.0433724
LOC5580227	-0.0623952	0.253734
LOC5580226	0.0952832	0.861059
LOC5580231	-0.0408395	0.742035
LOC5580230	-0.256468	0.140233
LOC5579494	-0.227214	0.556854
LOC5576867	-0.141077	0.568622
LOC5576866	-0.188686	0.15622
LOC5576869	-0.0387576	0.858849
LOC5578695	-0.487322	0.207295
LOC110679001	0.206479	0.173493
LOC5578696	-0.142594	0.609313
LOC5579419	-0.731911	0.000898149
LOC5578580	0.181688	0.629971
LOC5569912	0.245535	0.697894
LOC5570293	0.0239288	0.958313
LOC5568284	-0.109928	0.748704
LOC5568281	-0.173758	0.548499
LOC5568279	-0.00211957	0.990644
LOC5568276	0.0112804	0.9632
LOC5568277	0.259299	0.742779
LOC5568274	0.0711707	0.892921
LOC5575196	-0.162518	0.512269
LOC110679174	0.16349	0.556058
LOC5566081	-0.122232	0.401727
LOC5566091	-0.161717	0.349674
LOC5566095	0.999186	0.0112276
LOC5566097	-0.218533	0.5014
LOC5571019	-0.403606	0.0587488
LOC5571018	-1.049	0.184035
LOC5567762	-0.0795904	0.598632
LOC5570645	0.218614	0.242765
LOC5570641	0.741405	0.145333
LOC23687431	-0.425432	0.35689
LOC110679265	-0.381712	0.196313
LOC5570644	-1.1867	0.00110674
LOC5569385	-0.177383	0.552159
LOC5570602	0.270671	0.0313387
LOC5570603	-0.274614	0.0228742
LOC5570607	0.523374	0.049106
LOC5570606	0.122537	0.549224
LOC110679314	-1.25408	0.283193
LOC5570605	1.06976	0.311304
LOC5574577	-0.0543597	0.723835
LOC5574582	-0.2128	0.434227
LOC5574583	0.0152845	0.92827
LOC5574607	-0.286104	0.302857
LOC5574585	0.320585	0.303772
LOC5574590	-0.314705	0.33911
LOC5574602	-0.156685	0.479701
LOC5574592	0.0404593	0.655562
LOC5574603	0.0761058	0.745823
LOC5574606	0.0697749	0.704938
LOC110679386	0.270555	0.33793
LOC5574604	-0.349482	0.025962
LOC5574605	0.163581	0.464517
LOC5574594	-0.0339123	0.921041
LOC5574596	0.0180804	0.927118
LOC5574597	0.202489	0.549213
LOC5574598	-0.00637302	0.968822
LOC5572715	0.453616	0.0274744
LOC110679468	0.240687	0.151967
LOC5575887	0.845215	0.352737
LOC5573874	-0.504584	0.197968
LOC110679499	0.0879046	0.91094
LOC5573866	-0.250324	0.136978
LOC5573867	-0.295115	0.330206
LOC5573868	-0.280424	0.0758301
LOC5573869	0.154622	0.363036
LOC5573870	0.0571798	0.773185
LOC5573872	-0.245761	0.19404
LOC5573865	-0.0949879	0.903208
LOC5568155	-0.503511	0.141209
LOC5568153	-0.0798607	0.863516
LOC5568152	0.0350449	0.89925
LOC5568159	0.366667	0.315566
LOC5565134	-0.372738	0.0666165
LOC5566203	0.00774719	0.976191
LOC5566195	-0.401596	0.0904835
LOC5566200	1.06894	0.37845
LOC5577246	-0.478823	0.292864
LOC5567424	-0.233673	0.20872
LOC5567414	0.41818	0.213759
LOC5567426	-0.064911	0.792987
LOC5567423	-2.23379	1.92816e-05
LOC5567422	0.0459203	0.848008
LOC5567421	0.165703	0.407675
LOC5567420	-0.172475	0.600764
LOC5567419	0.0975665	0.490106
LOC5567412	-0.495215	0.0379042
LOC5567410	0.141259	0.484271
LOC5567408	-0.0645661	0.849613
LOC5567407	0.0712229	0.512662
LOC5567404	-0.0248944	0.689888
LOC5567402	0.346843	0.337528
LOC5568345	-0.61526	0.245762
LOC5568344	-0.0615223	0.770917
LOC5568342	8.60041e-05	0.999186
LOC110673979	0.0421855	0.717395
LOC5568340	0.164638	0.373176
LOC5568339	-0.336456	0.154303
LOC5578528	0.369174	0.228928
LOC5578527	1.19945	0.499666
LOC5569452	-0.107815	0.817017
LOC5569463	-0.000597123	0.997398
LOC5569462	-0.208288	0.513412
LOC110679686	0.510916	0.289187
LOC110679689	0.627564	0.47631
LOC5569458	0.639917	0.0124313
LOC5569460	-0.132312	0.159299
LOC110679696	-0.553682	0.397848
LOC5578694	-0.547925	0.205091
LOC110679707	-0.920284	0.00305354
LOC5578693	-0.88557	0.0607709
LOC5578692	-0.14931	0.197004
LOC5578691	-0.987379	0.00488519
LOC5579410	-0.623616	0.105759
LOC5578689	-0.693901	0.00111238
LOC5578688	-0.399316	0.253635
LOC5578686	0.0969835	0.360368
LOC5578684	0.0312326	0.918838
LOC5578682	0.385676	0.0145177
LOC5578680	0.068637	0.893569
LOC5577524	-0.99384	0.101896
LOC110674002	0.243493	0.229366
LOC5577517	0.195382	0.141073
LOC23687808	-0.58433	0.470268
LOC5577510	0.0827289	0.201403
LOC5577509	0.0846944	0.410375
LOC5577507	-0.0724437	0.474052
LOC5577501	-0.181289	0.662197
LOC5577500	-0.0951847	0.620871
LOC5577497	-0.148789	0.486007
LOC5577498	-0.29343	0.312774
LOC5577499	-0.365725	0.0729506
LOC5577698	-0.483399	0.266424
LOC5577697	-0.378429	0.0435562
LOC5577700	-0.904086	0.0033737
LOC5577702	-0.472259	0.251207
LOC5577411	0.291648	0.170586
LOC5577407	0.0322853	0.669337
LOC5577406	0.434957	0.0668317
LOC5572734	-0.652504	0.303812
LOC5572726	-0.472868	0.00669732
LOC5572725	0.0341923	0.716834
LOC5572724	0.549026	0.0844641
LOC5566642	-0.299148	0.280676
LOC110680270	-0.729798	0.0108347
LOC5566650	-0.17744	0.778301
LOC23687749	1.44642	0.414255
LOC5568461	-0.350727	0.186665
LOC5568465	0.0497024	0.536208
LOC5577399	0.0507081	0.857112
LOC23687633	0.181521	0.285426
LOC5577423	0.0404106	0.867053
LOC5577404	-0.0581251	0.79531
LOC5577398	-0.020739	0.948368
LOC5572733	0.257722	0.402784
LOC5572732	-0.0828244	0.463804
LOC5579326	-0.211984	0.11447
LOC5572730	-0.271855	0.104688
LOC5572728	-0.223319	0.247409
LOC110680508	0.0338618	0.966887
LOC5572735	-0.258925	0.0538298
LOC5572737	-0.346312	0.00560952
LOC5572738	0.0501415	0.865146
LOC5572739	-0.102165	0.728847
LOC5572740	0.0320949	0.834387
LOC5567803	-0.30521	0.0368434
LOC5567802	-0.214576	0.191844
LOC5567801	-0.20042	0.481027
LOC5572743	0.224905	0.539242
LOC5567800	-0.482224	0.168508
LOC5567799	-0.0837977	0.573935
LOC5567796	-0.150364	0.352196
LOC5567797	-0.211741	0.170909
LOC5567794	0.214301	0.265566
LOC5567793	-0.0894563	0.550078
LOC110680661	0.13911	0.378345
LOC5567791	0.664843	0.36652
LOC5567790	0.600653	0.0274767
LOC5567789	-0.439012	0.07079
LOC5567788	0.257566	0.360542
LOC5567787	0.115578	0.385406
LOC5567785	1.48651	0.416677
LOC5567784	-0.243702	0.240533
LOC5567783	0.493843	0.0596306
LOC5567782	-0.125877	0.514432
LOC5567781	0.0629873	0.480232
LOC5567780	-0.0779073	0.863212
LOC23687863	-0.639288	0.251815
LOC5567779	0.0180073	0.913418
LOC5567778	0.652692	0.251844
LOC5567772	-0.036334	0.820248
LOC5567770	0.159207	0.531812
LOC5567769	0.0908235	0.618206
LOC5567768	0.293648	0.023184
LOC5569269	0.0207699	0.950436
LOC5569268	-0.589837	0.0348119
LOC5569267	-0.445805	0.00453229
LOC5569266	0.0966055	0.755388
LOC5569265	-0.608705	0.302197
LOC5569262	-1.86503	0.10428
LOC5569260	0.0617551	0.832991
LOC5564699	0.0540286	0.891933
LOC5577130	0.204599	0.530169
LOC5571788	-0.373053	0.484522
LOC110681191	-0.419584	0.542442
LOC110681196	-0.309593	0.12978
LOC5571789	-0.221795	0.092176
LOC5571793	0.670389	0.335704
LOC5571791	0.474067	0.0415391
LOC5571785	0.173713	0.26025
LOC5571783	0.226893	0.136453
LOC5571790	0.157716	0.57813
LOC5571796	0.0267122	0.71599
LOC110681298	-0.182113	0.746583
LOC110681308	-0.086123	0.873629
LOC110681316	0.135024	0.797602
LOC5567070	0.312977	0.0219568
LOC5567069	-0.235772	0.187079
LOC110681343	0.00753068	0.975053
LOC5567068	-0.136892	0.364992
LOC110681370	-0.133948	0.721331
LOC5567067	-0.251072	0.396633
LOC5567066	-0.00472048	0.99343
LOC5567063	-0.490983	0.0695347
LOC5567062	-0.136849	0.405458
LOC5567061	-0.00376822	0.984543
LOC5567071	0.111348	0.546667
LOC5567072	0.0068977	0.960538
LOC5567073	0.193544	0.103078
LOC5567074	0.72768	0.0571283
LOC5567075	-0.216993	0.0503463
LOC5567076	0.124504	0.71344
LOC5567077	-0.291395	0.41576
LOC5567079	0.620183	0.553576
LOC5567081	-1.39108	0.159844
LOC5567085	-0.374153	0.227684
LOC5577530	0.0255166	0.871246
LOC5577527	-0.63094	0.230582
LOC5577529	-0.322483	0.380322
LOC5577531	-0.158087	0.544133
LOC5577526	-0.267567	0.247602
LOC5577532	-0.393586	0.423855
LOC5564080	0.337418	0.664264
LOC5578164	-0.282553	0.291636
LOC110681487	-0.568643	0.0904553
LOC110681488	0.488588	0.252169
LOC5576671	0.674174	0.368739
LOC110681489	1.14794	0.0406708
LOC5578996	-0.00771015	0.957376
LOC5578994	0.272232	0.136605
LOC5578992	-0.0570658	0.718255
LOC5578987	-0.0432082	0.607578
LOC5578986	0.0975685	0.549993
LOC110673995	0.694708	0.129041
LOC5578982	-0.219932	0.339543
LOC5578978	-0.0169099	0.924101
LOC5573377	0.0664946	0.808215
LOC5573383	-1.65229	0.000665028
LOC5573370	-0.184789	0.413479
LOC5573375	0.179902	0.656064
LOC5573374	-0.177479	0.579004
LOC5573373	0.275293	0.020745
LOC5573380	1.136	0.105802
LOC5573382	-0.4367	0.0263861
LOC5573371	-0.175047	0.651286
LOC5573372	-0.269065	0.167961
LOC5573381	-0.174866	0.363155
LOC5570621	-0.225742	0.494405
LOC5570622	-0.465576	0.129597
LOC5570624	-0.129098	0.464856
LOC5566404	0.153047	0.46859
LOC5577011	0.332176	0.0370554
LOC5577010	-0.149796	0.255554
LOC5577982	0.20432	0.22572
LOC5577985	-0.19144	0.208426
LOC5577984	0.289857	0.250727
LOC5577980	-0.235745	0.32671
LOC5577983	0.393457	0.134084
LOC5572600	0.0454438	0.585422
LOC5572599	0.627167	0.0361948
LOC110681498	-0.0794619	0.56436
LOC5572597	-0.146556	0.34397
LOC5572596	0.380049	0.244397
LOC5572595	0.0860435	0.592642
LOC5572590	-0.210536	0.0942993
LOC5572577	-0.548582	0.333678
LOC5572588	-0.0135334	0.741472
LOC5572580	-0.0561862	0.72681
LOC5572571	-0.755636	0.0118567
LOC5572572	1.42601	0.229065
LOC5572583	2.67089	0.162004
LOC110681502	2.25353	0.123144
LOC5572585	0.324776	0.192921
LOC5572582	0.0430687	0.663903
LOC5572581	0.0195681	0.960118
LOC5572584	0.613506	0.03717
LOC5580309	-0.0630838	0.888218
LOC5580307	0.508441	0.166266
LOC5580305	0.115957	0.537903
LOC5580310	-0.299519	0.0948264
LOC5580295	-1.53957	0.0394456
LOC5580293	-0.26748	0.1829
LOC5580291	0.722761	0.296548
LOC5570245	-0.549555	0.308465
LOC5580286	0.0778583	0.728098
LOC5580285	-0.0175322	0.942845
LOC110681507	0.138383	0.655276
LOC5580281	-0.165216	0.353074
LOC110681510	-0.761833	0.0343242
LOC5575726	-0.146537	0.0727777
LOC5575727	0.150094	0.483742
LOC5575730	0.042549	0.805768
LOC5575728	-0.947196	0.0579515
LOC5575729	-1.11873	0.0265619
LOC5575731	-0.104958	0.28225
LOC5572333	-0.0885253	0.374024
LOC5572334	-0.689182	0.061842
LOC5572335	-0.337016	0.0692464
LOC110681511	-0.0875975	0.648818
LOC110674313	0.24617	0.701511
LOC5572338	0.121544	0.640103
LOC5572339	-0.0952756	0.599826
LOC110681513	0.00928865	0.950196
LOC5567840	0.0514798	0.772092
LOC23687402	-0.0983318	0.343167
LOC110681514	-0.37776	0.340236
LOC5567839	-0.0950573	0.619191
LOC5567836	0.725398	0.549502
LOC5567835	-0.0366978	0.80931
LOC110681517	-0.167566	0.77335
LOC5567844	-0.134577	0.6617
LOC5567829	0.56707	0.115154
LOC5567828	-0.193539	0.212825
LOC5568719	-0.0173493	0.962973
LOC5568727	-0.683688	0.0618397
LOC5568726	-0.393034	0.017197
LOC110681519	0.0426861	0.928391
LOC110681520	-0.449767	0.298813
LOC5568723	-0.161626	0.874528
LOC5565238	-0.27556	0.660007
LOC5565239	0.387922	0.697967
LOC5565237	-0.131233	0.675122
LOC5564376	-0.0223671	0.953061
LOC5576294	0.238835	0.169288
LOC5570401	-0.392683	0.198988
LOC5576290	0.0110229	0.917579
LOC23687627	-0.0802164	0.686486
LOC5576289	-0.238711	0.656343
LOC5576288	0.150079	0.545587
LOC5576287	-0.462399	0.0994777
LOC5576286	-0.118384	0.576982
LOC110681523	-0.172734	0.534476
LOC5576285	0.236262	0.304626
LOC5576284	-0.167069	0.290348
LOC5576283	-0.400139	0.101761
LOC5565703	-0.0707854	0.46722
LOC5565705	-1.44381	0.0253864
LOC5565704	-0.104158	0.307686
LOC23687519	0.085432	0.776476
LOC5566035	-0.181693	0.363543
LOC5572169	0.481284	0.211384
LOC5572168	0.115727	0.649334
LOC5572167	-0.311835	0.0889289
LOC5577062	0.316287	0.292108
LOC5577060	-0.117898	0.62722
LOC5577057	-0.147053	0.683827
LOC5574629	-0.140358	0.441597
LOC5574628	0.18725	0.363666
LOC5574626	0.15459	0.601131
LOC5574625	0.335637	0.225223
LOC5574622	0.433113	0.475968
LOC5575917	0.308747	0.333979
LOC110681528	-0.14031	0.422817
LOC5564088	0.325082	0.256909
LOC5569222	-0.223744	0.27934
LOC5569219	-0.0870484	0.47449
LOC5569226	-0.0721791	0.770859
LOC5569225	1.08308	0.0219212
LOC5569227	-0.0816608	0.835029
LOC5567331	0.244414	0.413971
LOC5569230	0.0435055	0.78604
LOC5569231	-0.0965961	0.445787
LOC110681536	-0.308242	0.323129
LOC110681535	0.911016	0.261527
LOC5569234	-0.213207	0.608662
LOC5569236	0.298774	0.707506
LOC5569239	-0.184133	0.762697
LOC5569240	-0.00613328	0.996705
LOC5569242	-2.34532	0.373085
LOC5574059	-0.26964	0.128419
LOC5574058	0.370812	0.335667
LOC5574056	-0.0739782	0.576457
LOC5574055	0.0707036	0.701707
LOC5574054	0.71753	0.182983
LOC5574053	-0.561252	0.444939
LOC5574050	1.0662	0.0286241
LOC5574049	0.254022	0.364247
LOC5574048	-0.0204925	0.921215
LOC5574046	-0.336331	0.0345293
LOC5574044	-0.134928	0.0607599
LOC5571624	-0.171635	0.151898
LOC110681552	0.431709	0.574057
LOC5579360	-0.307498	0.231513
LOC5578520	0.525952	0.0729475
LOC5578517	0.452538	0.272046
LOC5578516	0.254388	0.396085
LOC5579206	-0.045421	0.73472
LOC5579205	0.0684774	0.749918
LOC5579204	0.405803	0.0908537
LOC5579208	0.0864411	0.626856
LOC5565056	-0.0337034	0.891303
LOC5565061	0.358174	0.430403
LOC5565069	0.230288	0.712468
LOC5576914	-0.14288	0.433136
LOC5576915	0.859818	0.0886582
LOC5576916	-0.0497821	0.839191
LOC5576917	0.0309739	0.914643
LOC5576918	0.170232	0.401518
LOC5578808	-0.254959	0.545637
LOC5576920	-0.358124	0.671909
LOC5576921	0.191209	0.310875
LOC5576923	0.202672	0.654523
LOC5580013	-0.252789	0.264177
LOC5580011	0.178818	0.507428
LOC5580010	0.617645	0.218682
LOC5580008	0.971845	0.288233
LOC5580009	-0.0791534	0.675563
LOC5580006	-0.145732	0.0509592
LOC5580003	0.726371	0.169932
LOC5580016	-0.227551	0.158865
LOC5574615	-0.44384	0.392372
LOC5574616	-0.0153738	0.957886
LOC5574614	-0.608834	0.0957723
LOC5574612	0.339376	0.0817145
LOC5574618	-0.202994	0.393185
LOC5568967	-0.160844	0.554696
LOC5564607	-0.315948	0.387139
LOC5564606	0.387485	0.026638
LOC5564604	-0.168969	0.512909
LOC5564605	-0.175375	0.26677
LOC5574690	-0.261857	0.0947677
LOC5574692	-0.346958	0.0973787
LOC5567597	-0.203125	0.530348
LOC5567596	-0.0465957	0.918626
LOC5567595	0.0716955	0.6996
LOC5567614	-0.247806	0.16337
LOC5567615	-0.450207	0.359015
LOC5567616	-0.442597	0.00654667
LOC5567610	-0.438431	0.363303
LOC5580206	-0.210541	0.410847
LOC5580205	1.25373	0.0386923
LOC5580204	0.0664951	0.631251
LOC5580194	-0.455165	0.19245
LOC5580192	0.0649535	0.747421
LOC5580191	-0.0422227	0.784074
LOC5580190	-0.273673	0.138827
LOC5580187	0.307096	0.530234
LOC5580186	-0.270622	0.121918
LOC5580184	0.00262216	0.988462
LOC5580182	-0.162605	0.246863
LOC5580180	-0.611307	0.264618
LOC5580179	-0.276332	0.216463
LOC5580178	-0.164394	0.333501
LOC5580175	-1.41329	0.0691755
LOC5580168	-0.335129	0.239369
LOC5580170	-0.207764	0.771693
LOC5580162	0.0795799	0.515109
LOC5580166	-1.75803	0.0002836
LOC5580163	-0.978056	0.559856
LOC5580164	3.41232	0.352443
LOC5580169	0.790957	0.0961816
LOC5580171	-0.146638	0.209526
LOC5580174	-0.153362	0.694499
LOC5580173	-0.184419	0.0136449
LOC5578271	-0.447037	0.00567605
LOC5578274	-0.496536	0.474175
LOC5578275	0.0269685	0.839383
LOC5578276	-0.158278	0.272256
LOC5578277	-0.301472	0.227185
LOC5578278	0.0400692	0.815636
LOC110674025	0.124775	0.721317
LOC5574121	-0.627511	0.394154
LOC5575984	0.151665	0.42217
LOC5575985	0.241042	0.233844
LOC5575986	-0.264576	0.139502
LOC5575988	0.732876	0.469464
LOC5571521	-0.267514	0.304688
LOC5571512	-0.418345	0.119476
LOC5571518	0.0142131	0.927266
LOC5571516	0.202939	0.616568
LOC110674034	0.256473	0.133508
LOC5564681	-0.367867	0.20512
LOC5564694	2.54042	0.384348
LOC5564679	2.50051	0.40432
LOC5564684	2.64066	0.386565
LOC5564685	0.0387542	0.938739
LOC5564690	0.219243	0.788652
LOC5564678	0.23379	0.524102
LOC5578532	-0.0408221	0.845624
LOC5578530	-0.21682	0.278928
LOC23687580	0.0198687	0.932716
LOC5574921	-0.0747131	0.808065
LOC5574917	0.295687	0.409204
LOC5563729	-0.355918	0.342672
LOC110674038	-0.106404	0.580434
LOC5577037	-1.32958	0.0190126
LOC5577040	-0.619564	0.0826983
LOC5577039	-0.696854	0.021388
LOC5573797	-0.174633	0.121966
LOC5573795	-0.16885	0.73701
LOC110674642	-1.53688	0.231428
LOC5570839	-0.221546	0.0589048
LOC5570837	-0.14041	0.435312
LOC5570841	0.760099	0.364416
LOC5570843	-0.535579	0.0135307
LOC5566668	0.0641661	0.72878
LOC23687901	0.0434052	0.811732
LOC5564810	0.00427192	0.984061
LOC5564808	0.275054	0.119371
LOC23687380	0.0346894	0.714968
LOC5564809	-0.0331652	0.853842
LOC5573469	0.214573	0.0649307
LOC5573468	-0.725568	0.0464739
LOC5576838	0.172957	0.649661
LOC5576839	0.184586	0.431681
LOC5576840	1.57006	0.181748
LOC5576841	-0.904347	0.000301826
LOC5576842	0.0433593	0.71331
LOC5563615	1.06088	0.44031
LOC5563664	-0.34272	0.0530642
LOC5563630	0.0461668	0.855091
LOC5563548	-0.346722	0.385025
LOC5563570	0.0687485	0.726278
LOC5563621	-0.539235	0.020282
LOC5580078	-0.294165	0.305513
LOC5580084	0.479326	0.0996149
LOC5580091	-0.315365	0.375722
LOC5565688	0.161613	0.567345
LOC5580095	-0.28488	0.0240631
LOC110674049	0.072067	0.441662
LOC5580096	0.0545489	0.718683
LOC5580097	0.142623	0.73202
LOC5580098	-0.0868833	0.698011
LOC5580100	0.213652	0.297993
LOC110674054	0.234261	0.704696
LOC5566485	-0.107634	0.483375
LOC5566484	0.503023	0.408724
LOC5566483	0.164984	0.507743
LOC5566482	-0.0781743	0.738045
LOC5566481	-0.229403	0.426337
LOC5566480	0.145474	0.0568458
LOC5566479	-0.49768	0.0296751
LOC5566478	0.248595	0.419118
LOC5566477	-0.262384	0.118683
LOC5566474	-0.329939	0.124094
LOC5566473	0.0780893	0.39369
LOC5566472	-0.422085	0.228593
LOC5566471	0.122127	0.478003
LOC5566470	-0.118864	0.455911
LOC5566468	-0.376377	0.00153638
LOC5566467	-0.14653	0.770358
LOC5566464	-0.151781	0.769422
LOC5566463	-0.222679	0.480862
LOC5566462	-0.366639	0.0186869
LOC5566461	-0.204561	0.471734
LOC5566459	0.786123	0.372014
LOC5579498	-0.364199	0.0317861
LOC5566457	2.43977	0.260953
LOC5578943	-0.292401	0.0479028
LOC5578942	0.155174	0.357273
LOC5578941	-0.144806	0.301459
LOC5578940	-0.440547	0.0811681
LOC5578938	0.408071	0.105038
LOC5578936	0.291859	0.427649
LOC5578935	-0.20736	0.507758
LOC5578934	-0.483179	0.0829954
LOC5578930	-2.21841	0.149867
LOC5578929	0.0787746	0.913144
LOC5578928	0.037002	0.792219
LOC5578927	0.525109	0.0387034
LOC5578926	-0.00890131	0.976002
LOC5578924	-0.177151	0.374941
LOC5578922	0.642448	0.585331
LOC5578921	-0.0413383	0.838285
LOC5578920	-0.115045	0.748861
LOC5578919	0.539019	0.464536
LOC5563724	0.975008	0.189551
LOC5563704	-0.040673	0.819361
LOC5563721	0.762683	0.0444358
LOC110674073	0.229424	0.699982
LOC5563723	-0.314056	0.290052
LOC5563722	-0.049937	0.755815
LOC5563705	0.0934467	0.634903
LOC5563708	0.312408	0.0875764
LOC5563720	-0.223945	0.193626
LOC5563717	0.0721754	0.890873
LOC5563719	0.0837579	0.894245
LOC5563706	0.303431	0.24323
LOC5563713	-0.00484589	0.978481
LOC5563712	0.150931	0.561374
LOC5563715	-0.623302	0.52324
LOC5563709	0.240261	0.335288
LOC5563711	-0.370306	0.0793258
LOC5563714	-0.23669	0.271857
LOC5577128	1.34151	0.440985
LOC5576740	-0.37552	0.103712
LOC5576367	-0.0574928	0.630955
LOC5576366	0.100835	0.0828628
LOC5576365	0.4054	0.487847
LOC5576364	-0.0109395	0.927843
LOC5576363	-0.367932	0.0602922
LOC5576362	-0.310262	0.152399
LOC5576360	-0.149534	0.581477
LOC5576359	0.194463	0.073088
LOC5576357	0.270117	0.0542405
LOC5576356	-0.874313	0.0141452
LOC5576353	-0.0020035	0.974835
LOC5576351	0.155574	0.441539
LOC5576352	-0.388381	0.507906
LOC5576350	-0.30489	0.0421678
LOC5576348	-0.376132	0.125922
LOC5576349	0.10298	0.498059
LOC5576345	-0.404319	0.00753787
LOC5576344	-0.38091	0.0777409
LOC5567293	-0.33367	0.311324
LOC5567292	-0.710356	0.362364
LOC5567291	0.394015	0.0121705
LOC5567290	0.0235538	0.884819
LOC5567294	-0.281977	0.158032
LOC5567287	0.229338	0.31463
LOC5567286	-0.13228	0.389894
LOC5567281	-1.25265	0.0675485
LOC5569124	-0.456348	0.00364273
LOC5569122	-0.508742	0.00247545
LOC5569123	-0.306564	0.272279
LOC5576734	-0.531028	0.00570782
LOC5576729	-0.214896	0.111761
LOC5576728	-0.467494	0.0668607
LOC5576739	-0.657564	0.127212
LOC5576726	0.0254484	0.925623
LOC5576725	-0.691986	0.187499
LOC5576724	-0.436646	0.0376174
LOC5576723	-0.192937	0.552413
LOC5576722	-0.252607	0.139783
LOC5579244	-0.349449	0.0313337
LOC5576721	-0.136259	0.57703
LOC23687643	0.105134	0.625622
LOC5576737	-0.0765992	0.337157
LOC110674665	0.492216	0.0904344
LOC5573635	0.166833	0.722221
LOC5573637	-0.451378	0.563073
LOC5578540	-0.126472	0.595227
LOC23687451	-0.769504	0.0446325
LOC5567119	-0.463844	0.428391
LOC5567507	-0.378222	0.390259
LOC5567506	0.421181	0.0299552
LOC5567505	0.0490096	0.848563
LOC5567509	-0.519775	0.155874
LOC5568915	0.530488	0.0420105
LOC5568914	-0.347471	0.06344
LOC5568913	-0.567081	0.00539369
LOC5568912	0.209076	0.581926
LOC5568910	-0.369418	0.011161
LOC5568917	0.434818	0.0597925
LOC5568908	0.124655	0.429978
LOC5568916	-0.949883	0.00687313
LOC5568897	0.461031	0.540181
LOC5568898	-0.136345	0.69049
LOC5573313	0.207911	0.37234
LOC5573309	0.0291403	0.71472
LOC5573310	-0.128386	0.460265
LOC5573314	0.0702941	0.660131
LOC5573315	0.00860712	0.972694
LOC5573316	-0.197735	0.540495
LOC5573319	-0.152936	0.297743
LOC5573320	0.165633	0.701856
LOC5573322	0.0910008	0.846015
LOC5573324	0.309876	0.651284
LOC5573325	0.508692	0.180181
LOC5573326	-0.0698667	0.578163
LOC5573327	-0.425823	0.152965
LOC5573328	-0.100889	0.500617
LOC5573336	0.60383	0.213882
LOC5569641	0.0519494	0.826106
LOC5569643	0.746486	0.0286605
LOC5569644	-0.237636	0.6147
LOC5575789	-0.030176	0.796925
LOC5575788	-1.50087	0.0660755
LOC5575792	0.456237	0.0965152
LOC5575790	-0.237661	0.272423
LOC5576390	-0.455491	0.318513
LOC5565578	0.48502	0.212035
LOC110674119	1.93696	0.236892
LOC23687481	0.392986	0.192726
LOC5576391	0.356432	0.23241
LOC110674122	0.413042	0.662736
LOC5575607	-1.00255	0.0619769
LOC5576401	-0.152504	0.628525
LOC5576400	-0.157477	0.258781
LOC5569057	-0.14458	0.467823
LOC5569056	-0.0128863	0.907542
LOC5576397	-0.145819	0.618329
LOC5563999	-0.357917	0.0124376
LOC5564001	-0.555809	0.0128847
LOC5573057	1.19767	0.00537746
LOC5573056	0.151766	0.288176
LOC5573065	-0.0083892	0.918983
LOC5564565	-0.203701	0.192261
LOC5566454	-0.714881	0.0761431
LOC5572371	0.0806737	0.916806
LOC5565349	-0.131119	0.793749
LOC5578805	-0.224979	0.812971
LOC5577392	-1.32036	0.0910587
LOC5577397	-0.322725	0.105496
LOC5572409	-0.864362	0.034667
LOC5579481	0.814138	0.436878
LOC5573441	-0.157095	0.638971
LOC5565298	-0.0467842	0.839749
LOC5573433	-0.451139	0.0765916
LOC5573440	-0.0818487	0.696528
LOC5565293	0.416334	0.0184173
LOC5573434	0.0877242	0.290973
LOC5573435	-0.242816	0.0313817
LOC5573438	-0.384278	0.0730275
LOC5573431	-0.263259	0.193197
LOC5573437	0.00895099	0.94573
LOC5573436	0.360918	0.167339
LOC5573442	-0.509521	0.575448
LOC5567327	-0.746004	0.00224613
LOC5564193	-1.06898	0.00352925
LOC5576567	-0.297033	0.249458
LOC5576569	-0.180937	0.41607
LOC23687928	0.0567541	0.790374
LOC5576570	-0.470272	0.00257131
LOC110674146	-0.196012	0.577997
LOC5576568	-0.0243331	0.93162
LOC5576566	-0.686403	0.100341
LOC5576563	0.638046	0.0564301
LOC110674148	-1.05841	0.202558
LOC110674150	0.21401	0.727375
LOC110674151	-1.53923	0.122917
LOC110674153	0.150808	0.716422
LOC5577198	0.123958	0.489103
[truncated: 7,792 more rows]

## Sheet: Fig.6
Fig.6 A
GPI mRNA level
iGFP	iAaERR
0.959103	0.379173
0.911483	0.347134
0.8334	0.331861
	0.316751
PYK mRNA level
iGFP	iERR
0.906458	0.519434
0.8426	0.519216
0.816631	0.520141
Fig.6 C
GPI
pGL4.73	+	+
pAc5.1b	+	-
PGL4.10-GPI	+	+
pAc5.1b-AaERR	-	+
	390	2400
	350	2300
	440	2100
	350
PYK
pGL4.73	+	+
pAc5.1b	+	-
PGL4.10-PYK	+	+
pAc5.1b-AaERR	-	+
	63	250
	55	260
	56	280
Fig.6 E
Fold enrichment of GPI promoter fragments in ChIP					Fold enrichment of PYK promoter fragments in ChIP
PAC5.1b	AaERR				PAC5.1b	AaERR
1.12352	3.13641				1.07434	3.3326
0.93614	3.37732				0.952877	4.35644
0.950781	3.23581				0.976833	4.8819
Fig.6 F
Fold enrichment of GPI coding region fragments in ChIP					Fold enrichment of PYK coding region fragments in ChIP
Control region	AaERR binding region				Control region	AaERR binding region
0.855097	29.9601				0.828975	72.8633
0.762666	27.5591				1.10488	94.9641
1.53338	31.9255				1.0918	84.281

## Sheet: Fig.7
Fig.7 A
FAS mRNA level
iGFP	iAaERR
1.05296	0.623511
1.32104	0.548348
1.36462	0.535651
0.952412	0.570185
Fig.7 B
FAS
pGL4.73	+	+
pAc5.1b	+	-
PGL4.10-FAS	+	+
pAc5.1b-AaERR	-	+
	2.9	14
	3.4	12
	3.4	11
	2.7	9.6
Fig.7 D
Fold enrichment of FAS promoter fragments in ChIP
PAC5.1b	AaERR
0.613887	32.0699
1.02717	30.869
1.58587	24.4184
Fig.7 E
Fold enrichment of FAS coding region fragments in ChIP
Control region	AaERR binding region
3.32411	28.1402
0.69641	57.4181
0.431977	37.3178

## Sheet: S1.Fig
S1.Fig.A
Met mRNA level
iGFP	iMet
0.946636	0.408373
1.0352	0.378187
1.02046	0.454726
	0.429581
S1.Fig.B
AaERR mRNA level
iGFP	iMet
0.968147	1.92231
0.981001	1.93081
1.0324	1.82712
1.01986	1.77303
S1.Fig.C
EcR mRNA level
iGFP	iEcR
0.912189	0.610023
1.0646	0.476213
	0.405374
1.00714	0.510715
S1.Fig.D
AaERR mRNA level
iGFP	iAaERR
0.982926	0.385789
0.953759	0.385179
1.02834	0.389319
1.0373	0.38186

## Sheet: S2.Fig
S3.Fig.
##Databases: KEGG PATHWAY
##Statistical test method: hypergeometric test / Fisher's exact test
##FDR correction method: Benjamini and Hochberg
#Term	Database	ID	Input number	Background number	P-Value	Corrected P-Value	Input	Hyperlink
Ribosome biogenesis in eukaryotes	KEGG PATHWAY	aag03008	7	67	4.57559e-07	9.60873e-06	5577910|5568330|23687857|5573067|5578343|5568030|23687841	http://www.genome.jp/kegg-bin/show_pathway?aag03008/aag:23687841%09red/aag:23687857%09red/aag:5568030%09red/aag:5577910%09red/aag:5578343%09red/aag:5573067%09red/aag:5568330%09red
Inositol phosphate metabolism	KEGG PATHWAY	aag00562	2	41	0.0308008	0.250711	5576220|5565995	http://www.genome.jp/kegg-bin/show_pathway?aag00562/aag:5565995%09red/aag:5576220%09red
Spliceosome	KEGG PATHWAY	aag03040	3	110	0.0358158	0.250711	5577910|5569643|110681430	http://www.genome.jp/kegg-bin/show_pathway?aag03040/aag:110681430%09red/aag:5569643%09red/aag:5577910%09red
Selenocompound metabolism	KEGG PATHWAY	aag00450	1	8	0.0560421	0.294221	5571153	http://www.genome.jp/kegg-bin/show_pathway?aag00450/aag:5571153%09red
2-Oxocarboxylic acid metabolism	KEGG PATHWAY	aag01210	1	14	0.0916618	0.38498	5566298	http://www.genome.jp/kegg-bin/show_pathway?aag01210/aag:5566298%09red
AGE-RAGE signaling pathway in diabetic complications	KEGG PATHWAY	aag04933	1	28	0.169675	0.450441	5566886	http://www.genome.jp/kegg-bin/show_pathway?aag04933/aag:5566886%09red
Phototransduction - fly	KEGG PATHWAY	aag04745	1	30	0.180264	0.450441	5572986	http://www.genome.jp/kegg-bin/show_pathway?aag04745/aag:5572986%09red
Citrate cycle (TCA cycle)	KEGG PATHWAY	aag00020	1	31	0.185508	0.450441	5566298	http://www.genome.jp/kegg-bin/show_pathway?aag00020/aag:5566298%09red
Glycolysis / Gluconeogenesis	KEGG PATHWAY	aag00010	1	37	0.21628	0.450441	5565995	http://www.genome.jp/kegg-bin/show_pathway?aag00010/aag:5565995%09red
Drug metabolism - other enzymes	KEGG PATHWAY	aag00983	1	39	0.226279	0.450441	5571747	http://www.genome.jp/kegg-bin/show_pathway?aag00983/aag:5571747%09red
Glutathione metabolism	KEGG PATHWAY	aag00480	1	42	0.241041	0.450441	5566298	http://www.genome.jp/kegg-bin/show_pathway?aag00480/aag:5566298%09red
Biosynthesis of amino acids	KEGG PATHWAY	aag01230	1	50	0.279054	0.450441	5566298	http://www.genome.jp/kegg-bin/show_pathway?aag01230/aag:5566298%09red
Hippo signaling pathway - fly	KEGG PATHWAY	aag04391	1	54	0.297347	0.450441	5572986	http://www.genome.jp/kegg-bin/show_pathway?aag04391/aag:5572986%09red
RNA degradation	KEGG PATHWAY	aag03018	1	55	0.301847	0.450441	5565415	http://www.genome.jp/kegg-bin/show_pathway?aag03018/aag:5565415%09red
Phagosome	KEGG PATHWAY	aag04145	1	63	0.336839	0.450441	5572986	http://www.genome.jp/kegg-bin/show_pathway?aag04145/aag:5572986%09red
Peroxisome	KEGG PATHWAY	aag04146	1	69	0.361937	0.450441	5566298	http://www.genome.jp/kegg-bin/show_pathway?aag04146/aag:5566298%09red
Lysosome	KEGG PATHWAY	aag04142	1	74	0.38213	0.450441	5572584	http://www.genome.jp/kegg-bin/show_pathway?aag04142/aag:5572584%09red
Purine metabolism	KEGG PATHWAY	aag00230	1	75	0.386092	0.450441	5571747	http://www.genome.jp/kegg-bin/show_pathway?aag00230/aag:5571747%09red
Carbon metabolism	KEGG PATHWAY	aag01200	1	85	0.424353	0.469021	5566298	http://www.genome.jp/kegg-bin/show_pathway?aag01200/aag:5566298%09red
Ribosome	KEGG PATHWAY	aag03010	1	126	0.558006	0.585906	5565839	http://www.genome.jp/kegg-bin/show_pathway?aag03010/aag:5565839%09red
Metabolic pathways	KEGG PATHWAY	aag01100	5	806	0.595494	0.595494	5576220|5566298|5565995|5571153|5571747	http://www.genome.jp/kegg-bin/show_pathway?aag01100/aag:5565995%09red/aag:5571747%09red/aag:5571153%09red/aag:5576220%09red/aag:5566298%09red
--------------------
#Term	Database	ID	Input number	Background number	P-Value	Corrected P-Value	Input	Hyperlink
--------------------
#Term	Database	ID	Input number	Background number	P-Value	Corrected P-Value	Input	Hyperlink
--------------------

## Sheet: S3.Fig
S2.Fig.A
PFK mRNA level
iGFP	iAaERR
0.909033	0.435625
1.10324	0.397002
0.980856	0.365732
1.01659	0.348136
PGM mRNA level
iGFP	iAaERR
0.962704	0.261915
1.10864	0.365183
0.936947	0.323932
	0.273338
S2.Fig.B
ACSL mRNA level
iGFP	iAaERR
0.965193	0.747342
1.03319	0.703223
0.995714	0.767616
1.0071	0.767378
ACACA mRNA level
iGFP	iAaERR
1.03271	0.382943
1.00726	0.382518
0.970401	0.415699
0.99067	0.387704
S2.Fig.C
Fold enrichment of PFK promoter fragments in ChIP					Fold enrichment of PGM promoter fragments in ChIP
PAC5.1b	AaERR				PAC5.1b	AaERR
0.966109	5.60236				1.11043	3.4603
1.11262	6.22407				0.849899	3.52532
0.930304	6.59563				1.0596	3.43135
S2.Fig.D
Fold enrichment of ACSL promoter fragments in ChIP					Fold enrichment of ACACA promoter fragments in ChIP
PAC5.1b	AaERR				PAC5.1b	AaERR
1.02402	4.23782				0.95276	4.48947
1.08638	3.93042				1.01178	4.8309
0.898899	4.0826				1.03736	4.72812
S2.Fig.E
Fold enrichment of PFK coding region fragments in ChIP					Fold enrichment of PGM coding region fragments in ChIP
Control region	AaERR binding region				Control region	AaERR binding region
1.01496	4.98925				0.809538	4.16965
1.02551	4.2644				1.31708	3.29309
0.960753	5.44154				0.937884	3.9313
S2.Fig.F
Fold enrichment of ACSL coding region fragments in ChIP					Fold enrichment of ACACA coding region fragments in ChIP
Control region	AaERR binding region				Control region	AaERR binding region
1.02441	989.476				0.418119	3.45137
1.04194	1091.2				1.29703	6.20056
0.936884	997.541				1.84395	4.65819
